# Supplementary material for: Acceptor-driven synergy in dihydropyridine-based compounds reveals giant static and frequency-dependent hyperpolarizabilities: a quantum exploration
Source: Royal Society of Chemistry journal article supplement (doi:10.1039/d5ra09811d), 2026-05-08
Supplement: d5ra09811d1.pdf [file d5ra09811d1.pdf]

## Supplementary

### Acceptor-Driven Synergy into Dihydropyridines-Based Compounds Uncovers Giant Static and Frequency Dependent Hyperpolarizabilities: A Quantum Exploration

Khansa Gull,<sup>1</sup> Memoona Arshad,<sup>1</sup> Sadia Jamal,<sup>1</sup> Rifat Jawaria,\*<sup>1</sup> Saif Ullah,<sup>2</sup> Muhammad Imran,<sup>3,4</sup>

<sup>1</sup>Institute of Chemistry, Khwaja Fareed University of Engineering & Information Technology, Rahim Yar Khan, 64200, Pakistan

<sup>2</sup>Govt Sadiq Abbas Graduate College Dera Nawab Sahib, Pakistan

<sup>3</sup>Department of Chemistry, Faculty of Science, King Khalid University, P.O. Box 9004, Abha 61413, Saudi Arabia.

<sup>4</sup>Research center for Advanced Materials Science (RCAMS), King Khalid University, Abha 61514, P. O. Box 9004, Saudi Arabia.

\*Corresponding author's E-mail address:

Dr. Rifat Jawaria([rifat.jawaria@kfueit.edu.pk](mailto:rifat.jawaria@kfueit.edu.pk))

**Table S1:** IUPAC names of designed compounds.

| Compounds   | IUPAC names                                                                                                                                                                                                       |
|-------------|-------------------------------------------------------------------------------------------------------------------------------------------------------------------------------------------------------------------|
| <b>CTPR</b> | 4-(9-methyl-9 <i>H</i> -carbazol-3-yl)-2-oxo-6-(thiophen-2-yl)-1,2-dihydropyridine-3-carbonitrile                                                                                                                 |
| <b>CTP1</b> | ( <i>E</i> )-2-(2-((5-(5-cyano-4-(9-methyl-9 <i>H</i> -carbazol-3-yl)-6-oxo-1,6-dihydropyridin-2-yl)thiophen-2-yl)methylene)-6-fluoro-3-oxo-2,3-dihydro-1 <i>H</i> -inden-1-ylidene)malononitrile                 |
| <b>CTP2</b> | ( <i>E</i> )-2-(2-((5-(5-cyano-4-(9-methyl-9 <i>H</i> -carbazol-3-yl)-6-oxo-1,6-dihydropyridin-2-yl)thiophen-2-yl)methylene)-5,6-difluoro-3-oxo-2,3-dihydro-1 <i>H</i> -inden-1-ylidene)malononitrile             |
| <b>CTP3</b> | ( <i>E</i> )-2-(5,6-dichloro-2-((5-(5-cyano-4-(9-methyl-9 <i>H</i> -carbazol-3-yl)-6-oxo-1,6-dihydropyridin-2-yl)thiophen-2-yl)methylene)-3-oxo-2,3-dihydro-1 <i>H</i> -inden-1-ylidene)malononitrile             |
| <b>CTP4</b> | ( <i>E</i> )-2-((5-(5-cyano-4-(9-methyl-9 <i>H</i> -carbazol-3-yl)-6-oxo-1,6-dihydropyridin-2-yl)thiophen-2-yl)methylene)-1-(dicyanomethylene)-3-oxo-2,3-dihydro-1 <i>H</i> -indene-5,6-dicarbonitrile            |
| <b>CTP5</b> | ( <i>E</i> )-2-(2-((5-(5-cyano-4-(9-methyl-9 <i>H</i> -carbazol-3-yl)-6-oxo-1,6-dihydropyridin-2-yl)thiophen-2-yl)methylene)-5,6-dinitro-3-oxo-2,3-dihydro-1 <i>H</i> -inden-1-ylidene)malononitrile              |
| <b>CTP6</b> | ( <i>E</i> )-2-(2-((5-(5-cyano-4-(9-methyl-9 <i>H</i> -carbazol-3-yl)-6-oxo-1,6-dihydropyridin-2-yl)thiophen-2-yl)methylene)-3-oxo-5,6-bis(trifluoromethyl)-2,3-dihydro-1 <i>H</i> -inden-1-ylidene)malononitrile |

**Table S2:** Cartesian coordinates of CTPR compound.

| Atom | x-axis   | Y-axis   | Z-axis   |
|------|----------|----------|----------|
| C    | 5.956965 | -1.37582 | -0.15062 |
| C    | 4.76581  | -0.68299 | 0.035932 |
| C    | 3.536258 | -1.17495 | -0.44876 |
| C    | 3.501393 | -2.38452 | -1.13699 |
| C    | 4.684411 | -3.07911 | -1.32778 |
| C    | 5.895499 | -2.57746 | -0.83861 |
| H    | 6.899774 | -0.99385 | 0.227976 |
| H    | 2.561627 | -2.77561 | -1.51697 |
| H    | 4.675761 | -4.02357 | -1.86214 |
| H    | 6.808592 | -3.14191 | -1.0006  |
| C    | 3.213395 | 0.821838 | 0.625236 |
| C    | 2.521636 | 1.917902 | 1.134774 |
| C    | 1.158699 | 1.980232 | 0.923313 |
| C    | 0.464064 | 0.969807 | 0.232205 |
| C    | 1.164294 | -0.13477 | -0.25113 |
| C    | 2.536787 | -0.20922 | -0.06913 |
| H    | 3.023935 | 2.703298 | 1.689273 |
| H    | 0.605671 | 2.820109 | 1.331149 |
| H    | 0.643948 | -0.91954 | -0.79436 |
| N    | 4.554839 | 0.523259 | 0.678243 |
| C    | 5.597044 | 1.304522 | 1.2983   |
| H    | 6.041686 | 0.76657  | 2.142131 |
| H    | 6.384508 | 1.536963 | 0.574529 |
| H    | 5.183036 | 2.24323  | 1.665357 |
| C    | -0.9929  | 1.051345 | 0.04316  |
| C    | -1.63104 | 2.222878 | -0.34865 |
| C    | -1.76708 | -0.10862 | 0.253613 |
| C    | -3.06887 | 2.297204 | -0.50812 |
| C    | -3.1311  | -0.07566 | 0.11545  |
| H    | -1.28564 | -1.03582 | 0.536506 |
| H    | -4.73783 | 1.157191 | -0.29955 |
| C    | -0.93242 | 3.409268 | -0.68636 |
| N    | -0.38692 | 4.385205 | -0.98017 |
| O    | -3.70454 | 3.282288 | -0.83559 |
| N    | -3.72602 | 1.093519 | -0.24545 |
| C    | -3.96794 | -1.23725 | 0.344156 |
| C    | -3.69459 | -2.30791 | 1.156331 |
| S    | -5.50846 | -1.43472 | -0.44492 |
| C    | -4.71647 | -3.28089 | 1.151099 |
| H    | -2.79754 | -2.37584 | 1.760768 |

|   |          |          |          |
|---|----------|----------|----------|
| C | -5.75701 | -2.94354 | 0.337781 |
| H | -4.68771 | -4.19319 | 1.733465 |
| H | -6.66248 | -3.4985  | 0.136303 |

**Table S3:** Cartesian coordinates of **CTP1** compound.

| Atom | x-axis   | Y-axis   | Z-axis   |
|------|----------|----------|----------|
| C    | 7.59384  | -4.10213 | -0.37864 |
| C    | 7.007018 | -2.86981 | -0.11365 |
| C    | 5.808784 | -2.46795 | -0.73884 |
| C    | 5.187455 | -3.31749 | -1.64954 |
| C    | 5.766814 | -4.54624 | -1.91892 |
| C    | 6.95561  | -4.93015 | -1.28875 |
| H    | 8.514881 | -4.40733 | 0.10786  |
| H    | 4.264033 | -3.02062 | -2.13903 |
| H    | 5.296372 | -5.2218  | -2.62595 |
| H    | 7.388828 | -5.89911 | -1.51672 |
| C    | 6.535106 | -0.83149 | 0.689456 |
| C    | 6.53004  | 0.381661 | 1.374012 |
| C    | 5.500243 | 1.265289 | 1.121073 |
| C    | 4.465426 | 0.965149 | 0.214524 |
| C    | 4.468523 | -0.26399 | -0.44523 |
| C    | 5.502952 | -1.15851 | -0.22252 |
| H    | 7.301216 | 0.634503 | 2.093655 |
| H    | 5.474569 | 2.203957 | 1.664672 |
| H    | 3.681298 | -0.50898 | -1.15374 |
| N    | 7.433448 | -1.87047 | 0.742623 |
| C    | 8.627125 | -1.95014 | 1.549062 |
| H    | 8.556781 | -2.77109 | 2.270121 |
| H    | 9.507535 | -2.10952 | 0.918543 |
| H    | 8.762568 | -1.01854 | 2.097594 |
| C    | 3.367476 | 1.912052 | -0.02494 |
| C    | 3.567638 | 3.278757 | -0.16804 |
| C    | 2.048568 | 1.408455 | -0.10615 |
| C    | 2.46933  | 4.202613 | -0.3822  |
| C    | 0.989971 | 2.249673 | -0.31897 |
| H    | 1.862537 | 0.357057 | 0.070104 |
| H    | 0.457715 | 4.221497 | -0.65956 |
| C    | 4.854482 | 3.87427  | -0.20112 |
| N    | 5.889984 | 4.385394 | -0.2467  |
| O    | 2.56694  | 5.405832 | -0.52935 |
| N    | 1.218586 | 3.585858 | -0.44079 |
| C    | -0.37636 | 1.767606 | -0.39352 |
| C    | -0.78384 | 0.51163  | -0.78391 |

|   |          |          |          |
|---|----------|----------|----------|
| S | -1.72477 | 2.76136  | 0.044286 |
| C | -2.16911 | 0.339557 | -0.71294 |
| H | -0.09706 | -0.24756 | -1.13757 |
| C | -2.83685 | 1.464161 | -0.27615 |
| H | -2.68099 | -0.56808 | -1.01129 |
| C | -4.23967 | 1.693266 | -0.13552 |
| C | -5.32709 | -0.58643 | 0.444703 |
| C | -6.64232 | 1.26034  | -0.26127 |
| C | -6.64902 | -1.07271 | 0.011991 |
| C | -7.4384  | 0.02666  | -0.35061 |
| C | -5.25096 | 0.816829 | 0.068503 |
| O | -7.00886 | 2.39353  | -0.4621  |
| C | -4.46235 | -1.26622 | 1.259067 |
| C | -4.66793 | -2.61994 | 1.643027 |
| N | -4.80575 | -3.72086 | 1.96303  |
| C | -3.35223 | -0.64274 | 1.889998 |
| N | -2.46406 | -0.1562  | 2.444774 |
| C | -7.17865 | -2.35445 | -0.04196 |
| C | -8.49334 | -2.47148 | -0.45931 |
| C | -9.29296 | -1.3895  | -0.8052  |
| C | -8.75515 | -0.11513 | -0.75044 |
| H | -6.62303 | -3.25027 | 0.205105 |
| H | -10.3158 | -1.57044 | -1.11543 |
| H | -9.34197 | 0.757689 | -1.01666 |
| F | -9.02031 | -3.69016 | -0.53291 |
| H | -4.58148 | 2.718489 | -0.29558 |

**Table S4:** Cartesian coordinates of **CTP2** compound.

| <b>Atom</b> | <b>x-axis</b> | <b>Y-axis</b> | <b>Z-axis</b> |
|-------------|---------------|---------------|---------------|
| C           | 8.14168       | -4.10258      | -0.28416      |
| C           | 7.503239      | -2.89479      | -0.02538      |
| C           | 6.292025      | -2.54403      | -0.65648      |
| C           | 5.708432      | -3.42328      | -1.56426      |
| C           | 6.338316      | -4.62879      | -1.82583      |
| C           | 7.540366      | -4.96057      | -1.19137      |
| H           | 9.075099      | -4.36585      | 0.203118      |
| H           | 4.77555       | -3.16682      | -2.05862      |
| H           | 5.897951      | -5.32612      | -2.5311       |
| H           | 8.014227      | -5.91142      | -1.41478      |
| C           | 6.951151      | -0.8711       | 0.762209      |
| C           | 6.902064      | 0.347656      | 1.434494      |
| C           | 5.839952      | 1.189777      | 1.174222      |
| C           | 4.816677      | 0.842344      | 0.271619      |

|   |          |          |          |
|---|----------|----------|----------|
| C | 4.866364 | -0.39044 | -0.37905 |
| C | 5.934039 | -1.24381 | -0.14926 |
| H | 7.665289 | 0.637112 | 2.148814 |
| H | 5.78003  | 2.132835 | 1.707567 |
| H | 4.090159 | -0.66969 | -1.08703 |
| N | 7.886048 | -1.8765  | 0.828753 |
| C | 9.086838 | -1.89771 | 1.628221 |
| H | 9.099944 | -2.77809 | 2.278379 |
| H | 9.979008 | -1.91458 | 0.993678 |
| H | 9.125663 | -1.00797 | 2.255897 |
| C | 3.683639 | 1.747714 | 0.031284 |
| C | 3.837884 | 3.116588 | -0.14278 |
| C | 2.383226 | 1.198042 | -0.03773 |
| C | 2.706807 | 4.001494 | -0.34848 |
| C | 1.293428 | 2.002281 | -0.23511 |
| H | 2.242922 | 0.130638 | 0.072218 |
| H | 0.678524 | 3.966989 | -0.45624 |
| C | 5.104539 | 3.752106 | -0.19814 |
| N | 6.123234 | 4.293997 | -0.26294 |
| O | 2.760103 | 5.207942 | -0.49098 |
| N | 1.475729 | 3.343478 | -0.37485 |
| C | -0.05592 | 1.473006 | -0.30767 |
| C | -0.51735 | 0.311187 | 0.269674 |
| S | -1.30937 | 2.2855   | -1.18184 |
| C | -1.87816 | 0.090347 | 0.040202 |
| H | 0.108215 | -0.34225 | 0.865261 |
| C | -2.47132 | 1.078022 | -0.71782 |
| H | -2.41753 | -0.7788  | 0.39882  |
| C | -3.80967 | 1.166129 | -1.20769 |
| C | -5.32441 | -0.01131 | 0.534234 |
| C | -6.12101 | 0.503973 | -1.6424  |
| C | -6.5314  | -0.80785 | 0.263102 |
| C | -7.02902 | -0.46212 | -0.99804 |
| C | -4.95264 | 0.629497 | -0.71866 |
| O | -6.26091 | 1.041487 | -2.7139  |
| C | -4.81424 | 0.255406 | 1.776198 |
| C | -5.3016  | -0.36876 | 2.95703  |
| N | -5.67498 | -0.87006 | 3.92802  |
| C | -3.84239 | 1.265913 | 2.007083 |
| N | -3.08031 | 2.103701 | 2.232225 |
| C | -7.20606 | -1.74424 | 1.039244 |
| C | -8.356   | -2.29673 | 0.516072 |
| C | -8.85138 | -1.92961 | -0.73744 |

|   |          |          |          |
|---|----------|----------|----------|
| C | -8.1908  | -1.00408 | -1.51417 |
| H | -6.8732  | -2.07456 | 2.015386 |
| H | -8.57247 | -0.72168 | -2.48945 |
| F | -9.02634 | -3.20478 | 1.207194 |
| F | -9.96715 | -2.50046 | -1.16097 |
| H | -3.94356 | 1.673486 | -2.16586 |

**Table S5:** Cartesian coordinates of **CTP3** compound.

| <b>Atom</b> | <b>x-axis</b> | <b>Y-axis</b> | <b>Z-axis</b> |
|-------------|---------------|---------------|---------------|
| C           | -9.01972      | 3.919421      | 0.739801      |
| C           | -8.36068      | 2.698657      | 0.646326      |
| C           | -7.09918      | 2.581021      | 0.027572      |
| C           | -6.4891       | 3.708686      | -0.51434      |
| C           | -7.14157      | 4.927321      | -0.42802      |
| C           | -8.39117      | 5.02727       | 0.193276      |
| H           | -9.9876       | 4.005656      | 1.223348      |
| H           | -5.51798      | 3.632538      | -0.99553      |
| H           | -6.68091      | 5.81716       | -0.84462      |
| H           | -8.8803       | 5.994779      | 0.250104      |
| C           | -7.78851      | 0.537463      | 0.798785      |
| C           | -7.7354       | -0.82889      | 1.064424      |
| C           | -6.62856      | -1.531        | 0.632401      |
| C           | -5.56413      | -0.90358      | -0.04299      |
| C           | -5.61756      | 0.470489      | -0.27906      |
| C           | -6.72841      | 1.192427      | 0.126799      |
| H           | -8.5284       | -1.33691      | 1.602534      |
| H           | -6.56622      | -2.59146      | 0.853219      |
| H           | -4.80733      | 0.969296      | -0.80484      |
| N           | -8.76498      | 1.455904      | 1.100556      |
| C           | -10.0065      | 1.2087        | 1.792763      |
| H           | -10.0126      | 1.689438      | 2.776656      |
| H           | -10.8498      | 1.589851      | 1.208948      |
| H           | -10.1437      | 0.136158      | 1.927933      |
| C           | -4.38505      | -1.66845      | -0.47119      |
| C           | -4.47076      | -2.92805      | -1.04795      |
| C           | -3.10379      | -1.09998      | -0.27562      |
| C           | -3.29419      | -3.68364      | -1.43826      |
| C           | -1.97449      | -1.78341      | -0.63424      |
| H           | -3.00884      | -0.14844      | 0.23114       |
| H           | -1.27063      | -3.51848      | -1.51794      |
| C           | -5.70394      | -3.54637      | -1.37858      |
| N           | -6.69222      | -4.06822      | -1.67233      |
| O           | -3.29298      | -4.78077      | -1.96187      |

|   |              |          |          |
|---|--------------|----------|----------|
| N | -2.09145     | -3.02324 | -1.1832  |
| C | -0.64487     | -1.24423 | -0.41296 |
| C | -0.29685     | 0.091125 | -0.38187 |
| S | 0.719105     | -2.2584  | -0.13658 |
| C | 1.061381     | 0.303505 | -0.14947 |
| H | -1.01178     | 0.887249 | -0.55113 |
| C | 1.781457     | -0.87171 | -0.00295 |
| H | 1.535935     | 1.272474 | -0.09641 |
| C | 3.144095     | -1.16259 | 0.28449  |
| C | 5.599924     | -0.86821 | 0.664654 |
| C | 4.391625     | 1.041617 | -0.0676  |
| C | 6.556242     | 0.174445 | 0.259363 |
| C | 5.841875     | 1.302983 | -0.14418 |
| C | 4.25964      | -0.37843 | 0.345491 |
| O | 3.524519     | 1.845963 | -0.32513 |
| C | 5.932411     | -2.03098 | 1.309236 |
| C | 7.276654     | -2.40751 | 1.57902  |
| N | 8.355735     | -2.74674 | 1.812228 |
| C | 4.981537     | -2.95339 | 1.826987 |
| N | 4.241604     | -3.72026 | 2.272996 |
| C | 7.944044     | 0.204908 | 0.234905 |
| C | 8.577698     | 1.366451 | -0.18842 |
| C | 7.844265     | 2.495893 | -0.57787 |
| C | 6.458155     | 2.463425 | -0.55564 |
| H | 8.557072     | -0.63951 | 0.521854 |
| H | 5.874971     | 3.327135 | -0.85711 |
| C | 110.30684500 | 1.383084 | -0.22378 |
| C | 18.63701900  | 3.941234 | -1.09551 |
| H | 3.313974     | -2.2223  | 0.458833 |

**Table S6:** Cartesian coordinates of **CTP4** compound.

| Atom | x-axis   | Y-axis   | Z-axis   |
|------|----------|----------|----------|
| C    | -7.96977 | 4.331511 | -0.39822 |
| C    | -7.43352 | 3.074988 | -0.13975 |
| C    | -6.24492 | 2.633185 | -0.75599 |
| C    | -5.58062 | 3.467642 | -1.65022 |
| C    | -6.10914 | 4.720599 | -1.91282 |
| C    | -7.2897  | 5.14358  | -1.29226 |
| H    | -8.88471 | 4.666224 | 0.08033  |
| H    | -4.664   | 3.140221 | -2.13293 |
| H    | -5.60487 | 5.384561 | -2.6074  |
| H    | -7.68294 | 6.130554 | -1.51532 |
| C    | -7.05431 | 1.009521 | 0.642407 |

|   |          |          |          |
|---|----------|----------|----------|
| C | -7.10854 | -0.21265 | 1.30859  |
| C | -6.11406 | -1.13512 | 1.053701 |
| C | -5.05658 | -0.86519 | 0.164101 |
| C | -4.99919 | 0.372631 | -0.47672 |
| C | -5.99846 | 1.306086 | -0.25304 |
| H | -7.89892 | -0.44322 | 2.014713 |
| H | -6.13448 | -2.0823  | 1.582595 |
| H | -4.19387 | 0.594497 | -1.17245 |
| N | -7.90901 | 2.083958 | 0.700241 |
| C | -9.11115 | 2.200455 | 1.489609 |
| H | -9.03125 | 3.031584 | 2.19765  |
| H | -9.9811  | 2.367797 | 0.846576 |
| H | -9.27117 | 1.28144  | 2.052582 |
| C | -3.99889 | -1.85621 | -0.07566 |
| C | -4.25797 | -3.2089  | -0.24645 |
| C | -2.65588 | -1.41302 | -0.12498 |
| C | -3.19963 | -4.17982 | -0.45554 |
| C | -1.63378 | -2.29957 | -0.32902 |
| H | -2.42624 | -0.37381 | 0.071065 |
| H | -1.18711 | -4.29093 | -0.69121 |
| C | -5.57009 | -3.74396 | -0.31328 |
| N | -6.62669 | -4.20595 | -0.38712 |
| O | -3.35117 | -5.37401 | -0.62549 |
| N | -1.92063 | -3.62222 | -0.47754 |
| C | -0.24529 | -1.87866 | -0.36108 |
| C | 0.224887 | -0.62748 | -0.70052 |
| S | 1.044556 | -2.94401 | 0.073387 |
| C | 1.610871 | -0.51688 | -0.58781 |
| H | -0.41957 | 0.171627 | -1.04514 |
| C | 2.220836 | -1.68586 | -0.17399 |
| H | 2.16643  | 0.377887 | -0.84411 |
| C | 3.601951 | -1.98417 | -0.01124 |
| C | 4.803678 | 0.230727 | 0.599408 |
| C | 6.021816 | -1.67623 | -0.11072 |
| C | 6.161485 | 0.652295 | 0.198671 |
| C | 6.8949   | -0.4798  | -0.16558 |
| C | 4.660431 | -1.15914 | 0.204328 |
| O | 6.343788 | -2.81746 | -0.32758 |
| C | 3.970724 | 0.949252 | 1.412854 |
| C | 4.246923 | 2.284864 | 1.815079 |
| N | 4.447117 | 3.372453 | 2.146793 |
| C | 2.820297 | 0.378711 | 2.020637 |
| N | 1.899255 | -0.07203 | 2.551036 |

|   |          |          |          |
|---|----------|----------|----------|
| C | 6.762638 | 1.902553 | 0.161514 |
| C | 8.096832 | 1.98379  | -0.2311  |
| C | 8.832023 | 0.829336 | -0.57155 |
| C | 8.219557 | -0.41953 | -0.53928 |
| H | 6.233164 | 2.813707 | 0.409819 |
| H | 8.763593 | -1.31918 | -0.80596 |
| H | 3.891263 | -3.02711 | -0.15909 |
| C | 8.725143 | 3.263961 | -0.28858 |
| N | 9.233998 | 4.297208 | -0.33583 |
| C | 10.20003 | 0.942138 | -0.95845 |
| N | 11.30606 | 1.032081 | -1.27099 |

**Table S7:** Cartesian coordinates of **CTP5** compound.

| Atom | x-axis   | Y-axis   | Z-axis   |
|------|----------|----------|----------|
| C    | -8.39512 | 4.46396  | -0.38872 |
| C    | -7.89185 | 3.193114 | -0.13386 |
| C    | -6.71974 | 2.7189   | -0.7574  |
| C    | -6.03808 | 3.535484 | -1.65518 |
| C    | -6.53367 | 4.802637 | -1.91415 |
| C    | -7.69846 | 5.257569 | -1.28649 |
| H    | -9.2982  | 4.822953 | 0.094767 |
| H    | -5.13392 | 3.18326  | -2.1439  |
| H    | -6.01561 | 5.452678 | -2.61175 |
| H    | -8.06599 | 6.254919 | -1.50726 |
| C    | -7.56817 | 1.115992 | 0.642071 |
| C    | -7.65602 | -0.10657 | 1.303865 |
| C    | -6.69062 | -1.05729 | 1.040932 |
| C    | -5.62929 | -0.81501 | 0.148166 |
| C    | -5.53787 | 0.422693 | -0.48875 |
| C    | -6.50861 | 1.384267 | -0.25803 |
| H    | -8.4505  | -0.31652 | 2.011811 |
| H    | -6.73705 | -2.00597 | 1.565524 |
| H    | -4.72906 | 0.622773 | -1.18706 |
| N    | -8.39031 | 2.215038 | 0.707833 |
| C    | -9.5852  | 2.363941 | 1.502656 |
| H    | -9.4856  | 3.204687 | 2.196578 |
| H    | -10.4572 | 2.536009 | 0.863496 |
| H    | -9.75593 | 1.457145 | 2.082073 |
| C    | -4.60241 | -1.83626 | -0.09888 |
| C    | -4.90298 | -3.17872 | -0.27957 |
| C    | -3.2459  | -1.43441 | -0.14231 |
| C    | -3.87531 | -4.1804  | -0.49799 |
| C    | -2.25208 | -2.35146 | -0.34896 |

|   |          |          |          |
|---|----------|----------|----------|
| H | -2.98345 | -0.405   | 0.064369 |
| H | -1.86655 | -4.35    | -0.73654 |
| C | -6.23131 | -3.67209 | -0.34889 |
| N | -7.30207 | -4.09989 | -0.42427 |
| O | -4.06426 | -5.36714 | -0.68143 |
| N | -2.57942 | -3.66294 | -0.51181 |
| C | -0.8499  | -1.97651 | -0.36401 |
| C | -0.33352 | -0.74745 | -0.71628 |
| S | 0.394852 | -3.07426 | 0.118443 |
| C | 1.052626 | -0.67889 | -0.57637 |
| H | -0.94589 | 0.064317 | -1.08879 |
| C | 1.616051 | -1.85855 | -0.12736 |
| H | 1.641873 | 0.192525 | -0.83804 |
| C | 2.982647 | -2.19685 | 0.070435 |
| C | 4.245322 | -0.00863 | 0.651777 |
| C | 5.412449 | -1.97171 | 0.011799 |
| C | 5.626237 | 0.356284 | 0.273037 |
| C | 6.328013 | -0.80683 | -0.04544 |
| C | 4.064276 | -1.40185 | 0.287527 |
| O | 5.700645 | -3.12659 | -0.17642 |
| C | 3.420744 | 0.760199 | 1.426516 |
| C | 3.731825 | 2.09836  | 1.793362 |
| N | 3.961238 | 3.189214 | 2.093816 |
| C | 2.239548 | 0.245593 | 2.025211 |
| N | 1.293212 | -0.15982 | 2.547483 |
| C | 6.274793 | 1.58506  | 0.230517 |
| C | 7.610562 | 1.595925 | -0.12075 |
| C | 8.301328 | 0.425879 | -0.42915 |
| C | 7.663853 | -0.79769 | -0.39108 |
| H | 5.787183 | 2.5248   | 0.458603 |
| H | 8.192507 | -1.70997 | -0.64546 |
| H | 3.240754 | -3.25182 | -0.04615 |
| N | 8.299456 | 2.901194 | -0.05108 |
| O | 7.735494 | 3.841499 | -0.55746 |
| O | 9.347724 | 2.9291   | 0.548905 |
| N | 9.692292 | 0.457135 | -0.91691 |
| O | 10.40698 | -0.45907 | -0.58564 |
| O | 9.995776 | 1.374657 | -1.64451 |

**Table S8:** Cartesian coordinates of **CTP6** compound.

| Atom | x-axis   | Y-axis   | Z-axis   |
|------|----------|----------|----------|
| C    | -8.82457 | 4.56264  | -0.41174 |
| C    | -8.35174 | 3.278865 | -0.16318 |

|   |          |          |          |
|---|----------|----------|----------|
| C | -7.17982 | 2.78728  | -0.77373 |
| C | -6.46992 | 3.597932 | -1.65496 |
| C | -6.93658 | 4.876965 | -1.90934 |
| C | -8.10001 | 5.349986 | -1.29271 |
| H | -9.72511 | 4.936882 | 0.064759 |
| H | -5.56603 | 3.232214 | -2.13418 |
| H | -6.39602 | 5.522543 | -2.59388 |
| H | -8.44363 | 6.356991 | -1.50812 |
| C | -8.07868 | 1.18988  | 0.600153 |
| C | -8.19807 | -0.03445 | 1.253532 |
| C | -7.2472  | -1.00154 | 0.997447 |
| C | -6.16932 | -0.77336 | 0.121069 |
| C | -6.04545 | 0.466504 | -0.50585 |
| C | -7.00116 | 1.444894 | -0.28217 |
| H | -9.0047  | -0.23276 | 1.95103  |
| H | -7.31811 | -1.95247 | 1.515247 |
| H | -5.22251 | 0.655566 | -1.19057 |
| N | -8.88319 | 2.302352 | 0.659901 |
| C | -10.0821 | 2.46843  | 1.445238 |
| H | -9.94559 | 3.238443 | 2.211683 |
| H | -10.9226 | 2.7535   | 0.804903 |
| H | -10.3311 | 1.528833 | 1.937697 |
| C | -5.15833 | -1.81249 | -0.11811 |
| C | -5.4837  | -3.14696 | -0.31621 |
| C | -3.7939  | -1.43777 | -0.13443 |
| C | -4.47326 | -4.16724 | -0.52752 |
| C | -2.81554 | -2.37326 | -0.33332 |
| H | -3.51364 | -0.41606 | 0.086854 |
| H | -2.46408 | -4.37438 | -0.73506 |
| C | -6.8207  | -3.61153 | -0.41155 |
| N | -7.89899 | -4.01562 | -0.50805 |
| O | -4.6826  | -5.34836 | -0.72554 |
| N | -3.16723 | -3.6757  | -0.51543 |
| C | -1.40534 | -2.03014 | -0.32296 |
| C | -0.85288 | -0.81464 | -0.66409 |
| S | -0.19465 | -3.16084 | 0.173224 |
| C | 0.534192 | -0.78373 | -0.50916 |
| H | -1.4394  | 0.013909 | -1.04155 |
| C | 1.060391 | -1.97802 | -0.05712 |
| H | 1.149783 | 0.071937 | -0.76205 |
| C | 2.417582 | -2.35497 | 0.151552 |
| C | 3.734764 | -0.20201 | 0.745323 |
| C | 4.853901 | -2.19605 | 0.11149  |

|   |          |          |          |
|---|----------|----------|----------|
| C | 5.123091 | 0.124102 | 0.362657 |
| C | 5.792202 | -1.05341 | 0.042843 |
| C | 3.516453 | -1.59176 | 0.381965 |
| O | 5.109321 | -3.361   | -0.06586 |
| C | 2.9278   | 0.585936 | 1.51925  |
| C | 3.275988 | 1.91284  | 1.893996 |
| N | 3.53292  | 2.995098 | 2.20341  |
| C | 1.729437 | 0.102862 | 2.110383 |
| N | 0.768653 | -0.27666 | 2.625913 |
| C | 5.807075 | 1.329914 | 0.300723 |
| C | 7.14711  | 1.33785  | -0.07017 |
| C | 7.821939 | 0.134717 | -0.35169 |
| C | 7.126341 | -1.06589 | -0.30082 |
| H | 5.317369 | 2.270523 | 0.51466  |
| H | 7.615745 | -2.00611 | -0.52711 |
| H | 2.648151 | -3.4156  | 0.027907 |
| C | 7.821621 | 2.692514 | -0.08672 |
| C | 9.273719 | 0.064245 | -0.76807 |
| F | 10.05687 | 0.830675 | -0.01105 |
| F | 9.434106 | 0.440604 | -2.03704 |
| F | 9.739993 | -1.18105 | -0.67108 |
| F | 8.671498 | 2.827658 | -1.10187 |
| F | 6.928059 | 3.676002 | -0.19576 |
| F | 8.496634 | 2.904233 | 1.044004 |

**Table S9:** Calculated energies ( $E$ ) and energy gap ( $\Delta E$ ) of **HOMO-1**, **LUMO+1**, **HOMO-2** and **LUMO+2** for **CTPR** and **CTP1-CTP6**.

| Compounds   | HOMO-1 | LUMO+1 | $\Delta E$ | HOMO-2 | LUMO+2 | $\Delta E$ |
|-------------|--------|--------|------------|--------|--------|------------|
| <b>CTPR</b> | -6.594 | -1.219 | 5.375      | -6.603 | -0.992 | 5.611      |
| <b>CTP1</b> | -6.625 | -2.855 | 3.770      | -6.687 | -2.255 | 4.432      |
| <b>CTP2</b> | -6.633 | -2.911 | 3.722      | -6.689 | -2.325 | 4.364      |
| <b>CTP3</b> | -6.645 | -2.338 | 4.307      | -6.748 | -3.011 | 3.737      |
| <b>CTP4</b> | -6.648 | -3.475 | 3.173      | -6.782 | -2.540 | 4.242      |
| <b>CTP5</b> | -6.648 | -3.619 | 3.029      | -6.799 | -2.689 | 4.110      |
| <b>CTP6</b> | -6.639 | -3.209 | 3.430      | -6.762 | -2.422 | 4.340      |

$E$ = energy,  $\Delta E(eV) = E_{\text{LUMO}} - E_{\text{HOMO}}$ ; HOMO= highest occupied molecular orbital; LUMO= lowest unoccupied molecular orbital; MO= molecular orbital; Units in  $eV$

**Table S10:** Global reactivity parameters of studied compounds **CTPR** and **CTP1-CTP6**.

| Compounds   | $IP$  | $EA$  | $X$   | $\eta$ | $\mu$  | $\omega$ | $\sigma$ | $\Delta N_{\text{max}}$ |
|-------------|-------|-------|-------|--------|--------|----------|----------|-------------------------|
| <b>CTPR</b> | 6.215 | 2.413 | 4.314 | 1.901  | -4.314 | 4.894    | 0.263    | 2.269                   |
| <b>CTP1</b> | 6.248 | 3.580 | 4.914 | 1.334  | -4.914 | 9.050    | 0.374    | 3.683                   |
| <b>CTP2</b> | 6.251 | 3.574 | 4.912 | 1.338  | -4.912 | 9.014    | 0.373    | 3.671                   |
| <b>CTP3</b> | 6.268 | 3.664 | 4.966 | 1.302  | -4.966 | 9.470    | 0.384    | 3.814                   |
| <b>CTP4</b> | 6.270 | 3.885 | 5.077 | 1.192  | -5.077 | 10.809   | 0.419    | 4.257                   |
| <b>CTP5</b> | 6.270 | 3.943 | 5.106 | 1.163  | -5.106 | 11.205   | 0.429    | 4.388                   |

**CTP6**      6.261    3.759    5.010    1.251    -5.010    10.032    0.399    4.004

Ionization potential (*IP*), electron affinity (*EA*), electronegativity (*X*), global hardness (*η*), chemical potential (*μ*), global electrophilicity (*ω*), global softness (*σ*) and maximum charge transfer index ( $\Delta N_{\max}$ ); Units in *eV*

**Table: S11** Wavelength, excitation energy and oscillator strength of investigated compound **CTPR**.

| No | DFT<br>$\lambda$ (nm) | <i>E</i> (eV) | <i>f</i> <sub>os</sub> | MO contributions                                      |
|----|-----------------------|---------------|------------------------|-------------------------------------------------------|
| 1  | 397.959               | 3.116         | 0.338                  | H→L (94%), H-2→L (3%)                                 |
| 2  | 368.069               | 3.369         | 0.538                  | H-2→L (52%), H-1→L (43%), H→L (3%)                    |
| 3  | 356.830               | 3.475         | 0.020                  | H-2→L (42%), H-1→L (53%), H→L+1 (2%)                  |
| 4  | 311.792               | 3.977         | 0.069                  | H→L+1 (88%),                                          |
| 5  | 285.935               | 4.336         | 0.041                  | H-2→L+1 (26%), H-1→L+1 (22%), H→L+2 (41%), H→L+3 (5%) |
| 6  | 284.231               | 4.362         | 0.140                  | H-4→L (35%), H-3→L (48%), H-6→L (6%), H-2→L+1 (2%)    |

MO=molecular orbital, H=HOMO, L=LUMO, *f*<sub>os</sub>= oscillator strength, wavelength=  $\lambda$  (nm)

**Table: S12** Wavelength, excitation energy and oscillator strength of investigated compound **CTP1**.

| No | DFT<br>$\lambda$ (nm) | <i>E</i> (eV) | <i>f</i> <sub>os</sub> | MO contributions                                                  |
|----|-----------------------|---------------|------------------------|-------------------------------------------------------------------|
| 1  | 548.821               | 2.259         | 0.071                  | H→L (96%), H-2→L (2%)                                             |
| 2  | 516.407               | 2.401         | 0.728                  | H-2→L (88%), H-3→L (2%), H-1→L (5%), H→L (3%)                     |
| 3  | 470.975               | 2.633         | 0.005                  | H-1→L (93%), H-2→L (5%)                                           |
| 4  | 417.034               | 2.973         | 0.111                  | H→L+1 (88%), H-2→L+1 (2%), H→L+2 (7%)                             |
| 5  | 398.958               | 3.108         | 0.281                  | H-2→L+1 (80%), H-5→L (5%), H-3→L+1 (3%), H-1→L+1 (5%), H→L+1 (3%) |
| 6  | 383.377               | 3.234         | 0.069                  | H-3→L (86%), H-4→L (6%), H-2→L (2%)                               |

MO=molecular orbital, H=HOMO, L=LUMO, *f*<sub>os</sub>= oscillator strength, wavelength=  $\lambda$  (nm)

**Table: S13** Wavelength, excitation energy and oscillator strength of investigated compound **CTP2**.

| No | DFT<br>$\lambda$ (nm) | <i>E</i> (eV) | <i>f</i> <sub>os</sub> | MO contributions                                       |
|----|-----------------------|---------------|------------------------|--------------------------------------------------------|
| 1  | 545.441               | 2.273         | 0.166                  | H→L (92%), H-2→L (6%)                                  |
| 2  | 512.141               | 2.421         | 0.668                  | H-2→L (90%), H-3→L (2%), H→L (6%)                      |
| 3  | 466.667               | 2.657         | 0.005                  | H-1→L (98%),                                           |
| 4  | 421.729               | 2.940         | 0.127                  | H→L+1 (85%), H-2→L+1 (6%), H→L+2 (7%)                  |
| 5  | 402.572               | 3.080         | 0.224                  | H-2→L+1 (81%), H-5→L (4%), H-5→L+1 (2%), H-3→L+1 (2%), |

|   |         |       |       |                                     |
|---|---------|-------|-------|-------------------------------------|
|   |         |       |       | H→L+1 (6%)                          |
| 6 | 381.831 | 3.247 | 0.076 | H-3→L (82%), H-4→L (9%), H-2→L (3%) |

MO=molecular orbital, H=HOMO, L=LUMO,  $f_{os}$  = oscillator strength, wavelength=  $\lambda$  (nm)

**Table: S14** Wavelength, excitation energy and oscillator strength of investigated compound CTP3.

| No | DFT $\lambda$ (nm) | $E$ (eV) | $f_{os}$ | MO contributions                                                  |
|----|--------------------|----------|----------|-------------------------------------------------------------------|
| 1  | 563.334            | 2.201    | 0.077    | H→L (97%),                                                        |
| 2  | 508.299            | 2.439    | 1.269    | H-2→L (93%), H-1→L (2%)                                           |
| 3  | 481.979            | 2.572    | 0.008    | H-1→L (95%), H-2→L (2%)                                           |
| 4  | 425.303            | 2.915    | 0.033    | H→L+1 (94%), H→L+2 (3%)                                           |
| 5  | 408.542            | 3.035    | 0.104    | H-2→L+1 (79%), H-5→L (2%), H-4→L (4%), H-3→L+1 (5%), H-1→L+1 (2%) |
| 6  | 390.305            | 3.177    | 0.094    | H-3→L (84%), H-8→L (4%), H-5→L (3%)                               |

MO=molecular orbital, H=HOMO, L=LUMO,  $f_{os}$  = oscillator strength, wavelength=  $\lambda$  (nm)

**Table: S15** Wavelength, excitation energy and oscillator strength of investigated compound CTP4.

| No | DFT $\lambda$ (nm) | $E$ (eV) | $f_{os}$ | MO contributions                          |
|----|--------------------|----------|----------|-------------------------------------------|
| 1  | 620.821            | 1.997    | 0.033    | H→L (98%),                                |
| 2  | 553.847            | 2.239    | 0.699    | H-2→L (93%), H-3→L (2%)                   |
| 3  | 523.273            | 2.369    | 0.005    | H-1→L (97%),                              |
| 4  | 501.311            | 2.473    | 0.017    | H→L+1 (97%),                              |
| 5  | 457.203            | 2.712    | 0.333    | H-2→L+1 (91%), H-3→L+1 (3%), H-1→L+1 (2%) |
| 6  | 435.537            | 2.847    | 0.005    | H-1→L+1 (95%),                            |

MO=molecular orbital, H=HOMO, L=LUMO,  $f_{os}$  = oscillator strength, wavelength=  $\lambda$  (nm)

**Table: S16** Wavelength, excitation energy and oscillator strength of investigated compound CTP5.

| No | DFT $\lambda$ (nm) | $E$ (eV) | $f_{os}$ | MO contributions                          |
|----|--------------------|----------|----------|-------------------------------------------|
| 1  | 633.866            | 1.956    | 0.023    | H→L (97%), H→L+1 (2%)                     |
| 2  | 559.571            | 2.216    | 0.594    | H-2→L (91%), H-3→L (2%)                   |
| 3  | 532.738            | 2.327    | 0.011    | H-1→L (70%), H→L+1 (26%),                 |
| 4  | 530.936            | 2.335    | 0.007    | H-1→L (26%), H→L+1 (70%),                 |
| 5  | 474.000            | 2.616    | 0.386    | H-2→L+1 (90%), H-3→L+1 (2%), H-1→L+1 (2%) |
| 6  | 458.047            | 2.707    | 0.006    | H-1→L+1 (94%), H-2→L+1 (2%), H-1→L (3%)   |

MO=molecular orbital, H=HOMO, L=LUMO,  $f_{os}$  = oscillator strength, wavelength=  $\lambda$  (nm)

**Table: S17** Wavelength, excitation energy and oscillator strength of investigated compound CTP6.

| No | DFT<br>$\lambda$ (nm) | $E$ (eV) | $f_{os}$ | MO contributions            |
|----|-----------------------|----------|----------|-----------------------------|
| 1  | 589.811               | 2.102    | 0.038    | H→L (98%),                  |
| 2  | 534.184               | 2.321    | 0.728    | H-2→L (93%), H-3→L (2%)     |
| 3  | 500.966               | 2.475    | 0.005    | H-1→L (97%),                |
| 4  | 458.064               | 2.707    | 0.033    | H→L+1 (96%), H→L+2 (2%)     |
| 5  | 426.722               | 2.906    | 0.312    | H-2→L+1 (89%), H-3→L+1 (3%) |
| 6  | 402.716               | 3.079    | 0.008    | H-1→L+1 (94%), H-1→L+2 (3%) |

MO=molecular orbital, H=HOMO, L=LUMO,  $f_{os}$ = oscillator strength, wavelength=  $\lambda$  (nm)

**Table: S18** Wavelength, excitation energy and oscillator strength of investigated compound CTPR.

| No | DFT<br>$\lambda$ (nm) | $E$ (eV) | $f_{os}$ | MO contributions                                        |
|----|-----------------------|----------|----------|---------------------------------------------------------|
| 1  | 390.489               | 3.175    | 0.156    | H→L (96%),                                              |
| 2  | 367.143               | 3.377    | 0.430    | H-1→L (89%), H-2→L (8%)                                 |
| 3  | 357.612               | 3.467    | 0.036    | H-2→L (87%), H-1→L (8%)                                 |
| 4  | 308.895               | 4.014    | 0.037    | H→L+1 (83%), H-2→L (2%), H-2→L+2 (3%),<br>H→L+2 (3%)    |
| 5  | 300.218               | 4.130    | 0.001    | H-4→L (74%), H-3→L (20%), H-5→L (2%)                    |
| 6  | 287.586               | 4.311    | 0.013    | H-2→L+1 (28%), H→L+2 (53%), H-1→L+1<br>(7%), H→L+3 (4%) |

MO=molecular orbital, H=HOMO, L=LUMO,  $f_{os}$ = oscillator strength, wavelength=  $\lambda$  (nm)

**Table: S19** Wavelength, excitation energy and oscillator strength of investigated compound CTP1.

| No | DFT<br>$\lambda$ (nm) | $E$ (eV) | $f_{os}$ | MO contributions                                          |
|----|-----------------------|----------|----------|-----------------------------------------------------------|
| 1  | 593.368               | 2.090    | 0.011    | H→L (99%),                                                |
| 2  | 535.523               | 2.315    | 0.504    | H-2→L (65%), H-1→L (33%),                                 |
| 3  | 511.782               | 2.423    | 0.035    | H-2→L (32%), H-1→L (66%),                                 |
| 4  | 433.906               | 2.857    | 0.024    | H→L+1 (95%), H→L+2 (3%)                                   |
| 5  | 409.243               | 3.030    | 0.257    | H-2→L+1 (65%), H-1→L+1 (24%), H-6→L (4%),<br>H-3→L+1 (3%) |
| 6  | 396.572               | 3.126    | 0.120    | H-4→L (19%), H-3→L (74%),                                 |

MO=molecular orbital, H=HOMO, L=LUMO,  $f_{os}$ = oscillator strength, wavelength=  $\lambda$  (nm)

**Table: S20** Wavelength, excitation energy and oscillator strength of investigated compound CTP2.

| No | DFT<br>$\lambda$ (nm) | $E$ (eV) | $f_{os}$ | MO contributions          |
|----|-----------------------|----------|----------|---------------------------|
| 1  | 589.811               | 2.102    | 0.012    | H→L (99%),                |
| 2  | 537.379               | 2.307    | 0.526    | H-2→L (71%), H-1→L (26%), |
| 3  | 509.175               | 2.435    | 0.026    | H-2→L (26%), H-1→L (72%), |

|   |         |       |       |                                                        |
|---|---------|-------|-------|--------------------------------------------------------|
| 4 | 440.207 | 2.817 | 0.020 | H→L+1 (96%), H→L+2 (3%)                                |
| 5 | 417.230 | 2.972 | 0.214 | H-2→L+1 (70%), H-1→L+1 (20%), H-6→L (3%), H-3→L+1 (2%) |
| 6 | 395.459 | 3.135 | 0.172 | H-4→L (24%), H-3→L (68%),                              |

MO=molecular orbital, H=HOMO, L=LUMO,  $f_{os}$  = oscillator strength, wavelength=  $\lambda$  (nm)

**Table: S21** Wavelength, excitation energy and oscillator strength of investigated compound CTP3.

| No | DFT $\lambda$ (nm) | $E$ (eV) | $f_{os}$ | MO contributions                                                                 |
|----|--------------------|----------|----------|----------------------------------------------------------------------------------|
| 1  | 594.962            | 2.084    | 0.011    | H→L (99%),                                                                       |
| 2  | 520.133            | 2.384    | 0.480    | H-2→L (25%), H-1→L (73%),                                                        |
| 3  | 510.034            | 2.431    | 0.483    | H-2→L (72%), H-1→L (25%),                                                        |
| 4  | 439.863            | 2.819    | 0.010    | H→L+1 (97%),                                                                     |
| 5  | 414.718            | 2.990    | 0.097    | H-2→L+1 (67%), H-1→L+1 (15%), H-5→L (4%), H-5→L+1 (3%), H-3→L (2%), H-3→L+1 (4%) |
| 6  | 398.036            | 3.115    | 0.183    | H-3→L (75%), H-7→L (6%), H-4→L (5%), H-1→L+1 (3%)                                |

MO=molecular orbital, H=HOMO, L=LUMO,  $f_{os}$  = oscillator strength, wavelength=  $\lambda$  (nm)

**Table: S22** Wavelength, excitation energy and oscillator strength of investigated compound CTP4.

| No | DFT $\lambda$ (nm) | $E$ (eV) | $f_{os}$ | MO contributions              |
|----|--------------------|----------|----------|-------------------------------|
| 1  | 709.251            | 1.748    | 0.006    | H→L (99%),                    |
| 2  | 600.728            | 2.064    | 0.047    | H-1→L (97%), H-2→L (2%)       |
| 3  | 578.743            | 2.142    | 0.463    | H-2→L (95%), H-1→L (2%)       |
| 4  | 545.273            | 2.274    | 0.008    | H→L+1 (98%),                  |
| 5  | 480.708            | 2.579    | 0.081    | H-2→L+1 (21%), H-1→L+1 (76%), |
| 6  | 470.385            | 2.636    | 0.146    | H-2→L+1 (74%), H-1→L+1 (22%), |

MO=molecular orbital, H=HOMO, L=LUMO,  $f_{os}$  = oscillator strength, wavelength=  $\lambda$  (nm)

**Table: S23** Wavelength, excitation energy and oscillator strength of investigated compound CTP5.

| No | DFT $\lambda$ (nm) | $E$ (eV) | $f_{os}$ | MO contributions            |
|----|--------------------|----------|----------|-----------------------------|
| 1  | 724.630            | 1.711    | 0.005    | H→L (99%),                  |
| 2  | 611.061            | 2.029    | 0.027    | H-1→L (97%),                |
| 3  | 584.252            | 2.122    | 0.406    | H-2→L (92%), H→L+1 (4%)     |
| 4  | 569.257            | 2.178    | 0.022    | H→L+1 (95%), H-2→L (4%)     |
| 5  | 497.629            | 2.492    | 0.037    | H-1→L+1 (92%), H-2→L+1 (6%) |
| 6  | 483.124            | 2.566    | 0.217    | H-2→L+1 (89%), H-1→L+1 (6%) |

MO=molecular orbital, H=HOMO, L=LUMO,  $f_{os}$  = oscillator strength, wavelength=  $\lambda$  (nm)

**Table: S24** Wavelength, excitation energy and oscillator strength of investigated compound CTP6.

| No | DFT<br>$\lambda$ (nm) | $E$ (eV) | $f_{os}$ | MO contributions              |
|----|-----------------------|----------|----------|-------------------------------|
| 1  | 658.580               | 1.883    | 0.007    | H→L (99%),                    |
| 2  | 565.312               | 2.193    | 0.143    | H-2→L (13%), H-1→L (85%),     |
| 3  | 552.761               | 2.243    | 0.387    | H-2→L (84%), H-1→L (14%),     |
| 4  | 492.979               | 2.515    | 0.008    | H→L+1 (98%),                  |
| 5  | 444.085               | 2.792    | 0.166    | H-2→L+1 (58%), H-1→L+1 (36%), |
| 6  | 434.240               | 2.855    | 0.053    | H-2→L+1 (35%), H-1→L+1 (61%), |

MO=molecular orbital, H=HOMO, L=LUMO,  $f_{os}$ = oscillator strength, wavelength= $\lambda$  (nm)

**Table S25:** Percentages of Donor,  $\pi$ -spacer and Acceptor for LUMOs and HOMOs.

| Compounds | LUMO  |               |          | HOMO  |               |          |
|-----------|-------|---------------|----------|-------|---------------|----------|
|           | Donor | $\pi$ -spacer | Acceptor | Donor | $\pi$ -spacer | Acceptor |
| CTPR      | 8.7   | 91.3          |          | 94.6  | 5.4           |          |
| CTP1      | 0.5   | 26.5          | 73       | 94.2  | 5.7           | 0.0      |
| CTP2      | 0.6   | 25.9          | 73.5     | 94.4  | 5.5           | 0.1      |
| CTP3      | 0.6   | 33.0          | 66.4     | 94.3  | 5.7           | 0.0      |
| CTP4      | 0.3   | 21.6          | 78.1     | 94.3  | 5.7           | 0.0      |
| CTP5      | 0.2   | 16.4          | 83.4     | 94.3  | 5.7           | 0.0      |
| CTP6      | 0.4   | 25.0          | 74.6     | 94.4  | 5.6           | 0.0      |

**Table S26:** Natural bond orbital (NBO) analysis of Compound CTPR.

| Donor( <i>i</i> ) | Type     | Acceptor( <i>j</i> ) | Type       | $E^{(2)}$<br>[kcal/mol] | $E_{(j)}E_{(i)}$<br>[a.u] | $F_{(i,j)}$<br>[a.u] |
|-------------------|----------|----------------------|------------|-------------------------|---------------------------|----------------------|
| C27 - C29         | $\pi$    | C25 - C26            | $\pi^*$    | 28.17                   | 0.31                      | 0.085                |
| C11 - C16         | $\pi$    | C14 - C15            | $\pi^*$    | 26.07                   | 0.29                      | 0.079                |
| C 1 - C 2         | $\pi$    | C 5 - C 6            | $\pi^*$    | 24.84                   | 0.3                       | 0.077                |
| C 5 - C 6         | $\pi$    | C 3 - C 4            | $\pi^*$    | 23.89                   | 0.3                       | 0.076                |
| C11 - C16         | $\pi$    | C 3 - C 4            | $\pi^*$    | 22.56                   | 0.3                       | 0.074                |
| C 3 - C 4         | $\pi$    | C 5 - C 6            | $\pi^*$    | 21.07                   | 0.29                      | 0.07                 |
| C 5 - C 6         | $\pi$    | C 1 - C 2            | $\pi^*$    | 19.66                   | 0.29                      | 0.068                |
| C 1 - C 2         | $\pi$    | C 3 - C 4            | $\pi^*$    | 18.36                   | 0.31                      | 0.068                |
| C39 - C41         | $\pi$    | C36 - C37            | $\pi^*$    | 17.98                   | 0.31                      | 0.07                 |
| C36 - C37         | $\pi$    | C39 - C41            | $\pi^*$    | 15.91                   | 0.31                      | 0.065                |
| C14 - C15         | $\pi$    | C25 - C26            | $\pi^*$    | 13.6                    | 0.29                      | 0.056                |
| C25 - C26         | $\pi$    | C27 - C29            | $\pi^*$    | 10.86                   | 0.3                       | 0.052                |
| C27 - C29         | $\pi$    | C36 - C37            | $\pi^*$    | 9.42                    | 0.31                      | 0.049                |
| C25 - C26         | $\pi$    | C14 - C15            | $\pi^*$    | 4.99                    | 0.32                      | 0.037                |
| C39 - C41         | $\pi$    | C39 - C41            | $\pi^*$    | 0.5                     | 0.31                      | 0.012                |
| C26 - C32         | $\sigma$ | C32 - N33            | $\sigma^*$ | 8.44                    | 1.62                      | 0.105                |
| C32 - N33         | $\sigma$ | C26 - C32            | $\sigma^*$ | 7.97                    | 1.59                      | 0.101                |
| C 1 - C 6         | $\sigma$ | C 2 - N20            | $\sigma^*$ | 6.23                    | 1.16                      | 0.076                |
| C27 - C29         | $\sigma$ | C29 - C36            | $\sigma^*$ | 5.98                    | 1.24                      | 0.077                |
| C 2 - C 3         | $\sigma$ | C 1 - C 2            | $\sigma^*$ | 5.21                    | 1.26                      | 0.073                |

|           |          |           |            |       |      |       |
|-----------|----------|-----------|------------|-------|------|-------|
| C15 - C16 | $\sigma$ | C11 - C16 | $\sigma^*$ | 4.98  | 1.26 | 0.071 |
| C27 - H30 | $\sigma$ | C25 - C26 | $\sigma^*$ | 4.4   | 1.1  | 0.062 |
| C13 - H18 | $\sigma$ | C14 - C15 | $\sigma^*$ | 4.74  | 1.1  | 0.064 |
| C14 - C25 | $\sigma$ | C25 - C26 | $\sigma^*$ | 3.97  | 1.24 | 0.063 |
| C11 - C12 | $\sigma$ | C12 - C13 | $\sigma^*$ | 3.8   | 1.32 | 0.063 |
| C36 - S38 | $\sigma$ | C41 - H43 | $\sigma^*$ | 2.96  | 1.1  | 0.051 |
| C11 - C16 | $\sigma$ | C15 - H19 | $\sigma^*$ | 2.71  | 1.08 | 0.049 |
| C25 - C27 | $\sigma$ | C13 - C14 | $\sigma^*$ | 1.99  | 1.27 | 0.045 |
| C13 - H18 | $\sigma$ | C12 - C13 | $\sigma^*$ | 0.98  | 1.12 | 0.03  |
| C41 - H43 | $\sigma$ | S38 - C41 | $\sigma^*$ | 0.55  | 0.78 | 0.019 |
| N35       | LP (1)   | C27 - C29 | $\pi^*$    | 50.24 | 0.32 | 0.115 |
| N20       | LP (1)   | C 1 - C 2 | $\pi^*$    | 43.26 | 0.31 | 0.104 |
| N20       | LP (1)   | C11 - C16 | $\pi^*$    | 41.71 | 0.3  | 0.103 |
| S38       | LP (2)   | C39 - C41 | $\pi^*$    | 24.99 | 0.28 | 0.076 |
| S38       | LP (2)   | C36 - C37 | $\pi^*$    | 23.75 | 0.28 | 0.073 |
| O34       | LP (2)   | C32 - N33 | $\pi^*$    | 0.87  | 0.39 | 0.017 |
| O34       | LP (2)   | C28 - N35 | $\sigma^*$ | 29.09 | 0.67 | 0.127 |
| O34       | LP (2)   | C26 - C28 | $\sigma^*$ | 19.43 | 0.75 | 0.109 |
| N33       | LP (1)   | C26 - C32 | $\sigma^*$ | 12.23 | 1.06 | 0.102 |
| N20       | LP (1)   | C21 - H22 | $\sigma^*$ | 5.73  | 0.64 | 0.06  |
| N20       | LP (1)   | C21 - H23 | $\sigma^*$ | 4.79  | 0.64 | 0.055 |
| O34       | LP (1)   | C26 - C28 | $\sigma^*$ | 2.83  | 1.18 | 0.052 |
| S38       | LP (1)   | C36 - C37 | $\sigma^*$ | 2.51  | 1.24 | 0.05  |
| S38       | LP (1)   | C39 - C41 | $\sigma^*$ | 2.21  | 1.25 | 0.047 |
| O34       | LP (1)   | C28 - N35 | $\sigma^*$ | 1.45  | 1.11 | 0.036 |
| O34       | LP (2)   | C29 - N35 | $\sigma^*$ | 0.57  | 0.72 | 0.019 |

**Table S27:** Natural bond orbital (NBO) analysis of Compound CTP1.

| Donor( <i>i</i> ) | Type  | Acceptor( <i>j</i> ) | Type    | $E^{(2)}$<br>[kcal/mol] | $E_{(j)} \cdot E_{(i)}$<br>[a.u] | $F_{(ij)}$<br>[a.u] |
|-------------------|-------|----------------------|---------|-------------------------|----------------------------------|---------------------|
| C11 - C16         | $\pi$ | C14 - C15            | $\pi^*$ | 26.51                   | 0.29                             | 0.079               |
| C57 - C58         | $\pi$ | C55 - C56            | $\pi^*$ | 25.82                   | 0.29                             | 0.077               |
| C55 - C56         | $\pi$ | C46 - C47            | $\pi^*$ | 24.9                    | 0.31                             | 0.08                |
| C5 - C6           | $\pi$ | C3 - C4              | $\pi^*$ | 23.91                   | 0.3                              | 0.076               |
| C46 - C47         | $\pi$ | C57 - C58            | $\pi^*$ | 21.34                   | 0.3                              | 0.074               |
| C43 - C48         | $\pi$ | C44 - C50            | $\pi^*$ | 19.14                   | 0.31                             | 0.069               |
| C12 - C13         | $\pi$ | C14 - C15            | $\pi^*$ | 17.56                   | 0.3                              | 0.067               |
| C3 - C4           | $\pi$ | C11 - C16            | $\pi^*$ | 15.82                   | 0.28                             | 0.062               |
| C27 - C29         | $\pi$ | C36 - C37            | $\pi^*$ | 10.19                   | 0.3                              | 0.05                |
| C44 - C50         | $\pi$ | C46 - C47            | $\pi^*$ | 8.57                    | 0.33                             | 0.051               |
| C25 - C26         | $\pi$ | C14 - C15            | $\pi^*$ | 5.29                    | 0.32                             | 0.038               |

|           |          |           |            |       |      |       |
|-----------|----------|-----------|------------|-------|------|-------|
| C45 - O49 | $\pi$    | C46 - C47 | $\pi^*$    | 4.01  | 0.43 | 0.041 |
| C45 - O49 | $\pi$    | C43 - C48 | $\pi^*$    | 2.91  | 0.44 | 0.033 |
| C25 - C26 | $\pi$    | C25 - C26 | $\pi^*$    | 1.91  | 0.31 | 0.022 |
| C55 - C56 | $\pi$    | C55 - C56 | $\pi^*$    | 0.6   | 0.3  | 0.012 |
| C43 - H63 | $\sigma$ | C44 - C48 | $\sigma^*$ | 9.41  | 1.01 | 0.087 |
| C26 - C32 | $\sigma$ | C32 - N33 | $\sigma^*$ | 8.45  | 1.62 | 0.105 |
| C50 - C51 | $\sigma$ | C51 - N52 | $\sigma^*$ | 8.27  | 1.62 | 0.104 |
| C32 - N33 | $\sigma$ | C26 - C32 | $\sigma^*$ | 7.99  | 1.59 | 0.101 |
| C44 - C48 | $\sigma$ | C43 - C48 | $\sigma^*$ | 6.27  | 1.31 | 0.081 |
| C50 - C51 | $\sigma$ | C44 - C50 | $\sigma^*$ | 6.02  | 1.33 | 0.08  |
| C3 - C4   | $\sigma$ | C3 - C16  | $\sigma^*$ | 5.96  | 1.25 | 0.077 |
| C37 - H40 | $\sigma$ | C36 - S38 | $\sigma^*$ | 5.65  | 0.74 | 0.058 |
| C11 - C16 | $\sigma$ | C11 - C12 | $\sigma^*$ | 4.83  | 1.25 | 0.07  |
| C15 - C16 | $\sigma$ | C14 - C15 | $\sigma^*$ | 4.54  | 1.29 | 0.068 |
| C25 - C26 | $\sigma$ | C14 - C25 | $\sigma^*$ | 3.9   | 1.23 | 0.062 |
| C28 - N35 | $\sigma$ | C29 - C36 | $\sigma^*$ | 2.96  | 1.31 | 0.056 |
| C11 - C16 | $\sigma$ | C11 - N20 | $\sigma^*$ | 1.64  | 1.13 | 0.039 |
| C39 - H42 | $\sigma$ | C37 - C39 | $\sigma^*$ | 0.87  | 1.1  | 0.028 |
| C56 - F62 | $\sigma$ | C55 - C56 | $\sigma^*$ | 0.52  | 1.65 | 0.026 |
| N35       | LP (1)   | C27 - C29 | $\pi^*$    | 48.96 | 0.32 | 0.114 |
| N20       | LP (1)   | C1 - C2   | $\pi^*$    | 43.09 | 0.31 | 0.104 |
| N20       | LP (1)   | C11 - C16 | $\pi^*$    | 42.05 | 0.3  | 0.103 |
| S38       | LP (2)   | C36 - C37 | $\pi^*$    | 25.68 | 0.27 | 0.076 |
| S 38      | LP (2)   | C39 - C41 | $\pi^*$    | 23.92 | 0.28 | 0.073 |
| F62       | LP (3)   | C55 - C56 | $\pi^*$    | 21.1  | 0.46 | 0.094 |
| O34       | LP (2)   | C32 - N33 | $\pi^*$    | 0.9   | 0.39 | 0.017 |
| O34       | LP (2)   | C28 - N35 | $\sigma^*$ | 29.21 | 0.67 | 0.127 |
| O49       | LP (2)   | C45 - C48 | $\sigma^*$ | 22.84 | 0.71 | 0.115 |
| O49       | LP (2)   | C45 - C47 | $\sigma^*$ | 20.7  | 0.75 | 0.113 |
| O34       | LP (2)   | C26 - C28 | $\sigma^*$ | 19.64 | 0.74 | 0.11  |
| N54       | LP (1)   | C50 - C53 | $\sigma^*$ | 12.68 | 1.04 | 0.103 |
| N52       | LP (1)   | C50 - C51 | $\sigma^*$ | 12.59 | 1.04 | 0.102 |
| N33       | LP (1)   | C26 - C32 | $\sigma^*$ | 12.25 | 1.06 | 0.102 |
| F62       | LP (2)   | C56 - C57 | $\sigma^*$ | 6.48  | 1    | 0.072 |
| F62       | LP (2)   | C55 - C56 | $\sigma^*$ | 6.46  | 1    | 0.072 |
| N20       | LP (1)   | C21 - H22 | $\sigma^*$ | 5.54  | 0.64 | 0.059 |
| N20       | LP (1)   | C21 - H23 | $\sigma^*$ | 4.95  | 0.64 | 0.056 |
| O34       | LP (1)   | C26 - C28 | $\sigma^*$ | 2.82  | 1.18 | 0.052 |
| O34       | LP (1)   | C28 - N35 | $\sigma^*$ | 1.45  | 1.11 | 0.036 |
| O34       | LP (2)   | C29 - N35 | $\sigma^*$ | 0.57  | 0.72 | 0.019 |
| F62       | LP (2)   | C46 - C55 | $\sigma^*$ | 0.5   | 1.02 | 0.02  |

**Table S28:** Natural bond orbital (NBO) analysis of Compound CTP2.

| Donor( <i>i</i> ) | Type     | Acceptor( <i>j</i> ) | Type       | $E^{(2)}$<br>[kcal/mol] | $E_{(j)}-E_{(i)}$<br>[a.u.] | $F_{(ij)}$<br>[a.u.] |
|-------------------|----------|----------------------|------------|-------------------------|-----------------------------|----------------------|
| C11 - C16         | $\pi$    | C14 - C15            | $\pi^*$    | 26.41                   | 0.29                        | 0.079                |
| C1 - C2           | $\pi$    | C5 - C6              | $\pi^*$    | 24.83                   | 0.3                         | 0.077                |
| C55 - C56         | $\pi$    | C46 - C47            | $\pi^*$    | 21.81                   | 0.32                        | 0.076                |
| C46 - C47         | $\pi$    | C55 - C56            | $\pi^*$    | 20.25                   | 0.29                        | 0.069                |
| C1 - C2           | $\pi$    | C3 - C4              | $\pi^*$    | 18.39                   | 0.31                        | 0.068                |
| C39 - C41         | $\pi$    | C43 - C48            | $\pi^*$    | 16.89                   | 0.33                        | 0.068                |
| C36 - C37         | $\pi$    | C27 - C29            | $\pi^*$    | 14.65                   | 0.32                        | 0.062                |
| C25 - C26         | $\pi$    | C27 - C29            | $\pi^*$    | 11.35                   | 0.3                         | 0.053                |
| C27 - C29         | $\pi$    | C36 - C37            | $\pi^*$    | 10.23                   | 0.3                         | 0.05                 |
| C43 - C48         | $\pi$    | C39 - C41            | $\pi^*$    | 9.17                    | 0.31                        | 0.049                |
| C44 - C50         | $\pi$    | C43 - C48            | $\pi^*$    | 8.69                    | 0.35                        | 0.049                |
| C25 - C26         | $\pi$    | C14 - C15            | $\pi^*$    | 5.18                    | 0.32                        | 0.037                |
| C45 - O49         | $\pi$    | C46 - C47            | $\pi^*$    | 4.1                     | 0.42                        | 0.042                |
| C25 - C26         | $\pi$    | C25 - C26            | $\pi^*$    | 1.96                    | 0.31                        | 0.022                |
| C51 - N52         | $\pi$    | C53 - N54            | $\pi^*$    | 0.64                    | 0.48                        | 0.016                |
| C43 - H63         | $\sigma$ | C44 - C48            | $\sigma^*$ | 9.36                    | 1.01                        | 0.087                |
| C26 - C32         | $\sigma$ | C32 - N33            | $\sigma^*$ | 8.46                    | 1.62                        | 0.105                |
| C51 - N52         | $\sigma$ | C50 - C51            | $\sigma^*$ | 8.18                    | 1.57                        | 0.102                |
| C32 - N33         | $\sigma$ | C26 - C32            | $\sigma^*$ | 8                       | 1.59                        | 0.101                |
| C44 - C48         | $\sigma$ | C43 - C48            | $\sigma^*$ | 6.27                    | 1.31                        | 0.081                |
| C50 - C53         | $\sigma$ | C44 - C50            | $\sigma^*$ | 6.11                    | 1.33                        | 0.081                |
| C44 - C50         | $\sigma$ | C50 - C53            | $\sigma^*$ | 5.95                    | 1.28                        | 0.078                |
| C15 - H19         | $\sigma$ | C11 - C16            | $\sigma^*$ | 4.96                    | 1.07                        | 0.065                |
| C25 - C26         | $\sigma$ | C32 - N33            | $\sigma^*$ | 4.4                     | 1.61                        | 0.076                |
| C4 - C5           | $\sigma$ | C5 - C6              | $\sigma^*$ | 3.2                     | 1.29                        | 0.057                |
| C46 - C47         | $\sigma$ | C45 - O49            | $\sigma^*$ | 2.97                    | 1.31                        | 0.056                |
| C27 - C29         | $\sigma$ | H31 - N35            | $\sigma^*$ | 2.71                    | 1.13                        | 0.05                 |
| C56 - C57         | $\sigma$ | C55 - H59            | $\sigma^*$ | 1.84                    | 1.16                        | 0.041                |
| C37 - C39         | $\sigma$ | C39 - H42            | $\sigma^*$ | 1.3                     | 1.11                        | 0.034                |
| C53 - N54         | $\sigma$ | C44 - C50            | $\sigma^*$ | 0.54                    | 1.64                        | 0.027                |
| N35               | LP (1)   | C27 - C29            | $\pi^*$    | 49.22                   | 0.32                        | 0.114                |
| N20               | LP (1)   | C1 - C2              | $\pi^*$    | 43.13                   | 0.31                        | 0.104                |
| N20               | LP (1)   | C11 - C16            | $\pi^*$    | 42.03                   | 0.3                         | 0.103                |
| S38               | LP (2)   | C36 - C37            | $\pi^*$    | 25.68                   | 0.27                        | 0.076                |
| S38               | LP (2)   | C39 - C41            | $\pi^*$    | 23.94                   | 0.28                        | 0.073                |
| F61               | LP (3)   | C55 - C56            | $\pi^*$    | 21.04                   | 0.46                        | 0.094                |
| F62               | LP (3)   | C57 - C58            | $\pi^*$    | 20.85                   | 0.46                        | 0.093                |

|     |        |           |            |       |      |       |
|-----|--------|-----------|------------|-------|------|-------|
| O34 | LP (2) | C32 - N33 | $\pi^*$    | 0.88  | 0.39 | 0.017 |
| O34 | LP (2) | C28 - N35 | $\sigma^*$ | 29.27 | 0.67 | 0.127 |
| O49 | LP (2) | C45 - C48 | $\sigma^*$ | 22.66 | 0.72 | 0.115 |
| O49 | LP (2) | C45 - C47 | $\sigma^*$ | 21.14 | 0.75 | 0.114 |
| O34 | LP (2) | C26 - C28 | $\sigma^*$ | 19.63 | 0.74 | 0.11  |
| N54 | LP (1) | C50 - C53 | $\sigma^*$ | 12.7  | 1.04 | 0.103 |
| F62 | LP (2) | C56 - C57 | $\sigma^*$ | 7.75  | 0.97 | 0.078 |
| F62 | LP (2) | C57 - C58 | $\sigma^*$ | 6.38  | 1.01 | 0.072 |
| F61 | LP (2) | C55 - C56 | $\sigma^*$ | 6.24  | 1.01 | 0.071 |
| N20 | LP (1) | C21 - H23 | $\sigma^*$ | 5.64  | 0.64 | 0.059 |
| N20 | LP (1) | C21 - H22 | $\sigma^*$ | 4.85  | 0.64 | 0.055 |
| O34 | LP (1) | C26 - C28 | $\sigma^*$ | 2.83  | 1.18 | 0.052 |
| F61 | LP (1) | C55 - C56 | $\sigma^*$ | 1.55  | 1.63 | 0.045 |
| F62 | LP (1) | C56 - C57 | $\sigma^*$ | 1     | 1.59 | 0.036 |
| F61 | LP (1) | C56 - C57 | $\sigma^*$ | 0.96  | 1.59 | 0.035 |
| O34 | LP (2) | C29 - N35 | $\sigma^*$ | 0.57  | 0.72 | 0.019 |

**Table S29:** Natural bond orbital (NBO) analysis of Compound **CTP3**.

| Donor( <i>i</i> ) | Type     | Acceptor( <i>j</i> ) | Type       | $E^{(2)}$<br>[kcal/mol] | $E_{(j)}-E_{(i)}$<br>[a.u.] | $F_{(i,j)}$<br>[a.u.] |
|-------------------|----------|----------------------|------------|-------------------------|-----------------------------|-----------------------|
| C11 - C16         | $\pi$    | C14 - C15            | $\pi^*$    | 26.6                    | 0.29                        | 0.079                 |
| C27 - C29         | $\pi$    | C25 - C26            | $\pi^*$    | 25.53                   | 0.32                        | 0.082                 |
| C5 - C6           | $\pi$    | C3 - C4              | $\pi^*$    | 23.93                   | 0.3                         | 0.076                 |
| C36 - C37         | $\pi$    | C39 - C41            | $\pi^*$    | 20.26                   | 0.31                        | 0.073                 |
| C56 - C57         | $\pi$    | C46 - C55            | $\pi^*$    | 19.83                   | 0.33                        | 0.072                 |
| C1 - C2           | $\pi$    | C3 - C4              | $\pi^*$    | 18.41                   | 0.31                        | 0.068                 |
| C14 - C15         | $\pi$    | C11 - C16            | $\pi^*$    | 17.99                   | 0.29                        | 0.068                 |
| C3 - C4           | $\pi$    | C11 - C16            | $\pi^*$    | 15.82                   | 0.28                        | 0.062                 |
| C25 - C26         | $\pi$    | C27 - C29            | $\pi^*$    | 11.43                   | 0.3                         | 0.053                 |
| C44 - C50         | $\pi$    | C46 - C55            | $\pi^*$    | 9.5                     | 0.33                        | 0.052                 |
| C44 - C50         | $\pi$    | C43 - C48            | $\pi^*$    | 8.06                    | 0.34                        | 0.047                 |
| C25 - C26         | $\pi$    | C14 - C15            | $\pi^*$    | 5.32                    | 0.32                        | 0.038                 |
| C45 - O49         | $\pi$    | C43 - C48            | $\pi^*$    | 3.79                    | 0.44                        | 0.038                 |
| C25 - C26         | $\pi$    | C25 - C26            | $\pi^*$    | 1.84                    | 0.31                        | 0.022                 |
| C51 - N52         | $\pi$    | C53 - N54            | $\pi^*$    | 0.74                    | 0.47                        | 0.017                 |
| C26 - C32         | $\sigma$ | C32 - N33            | $\sigma^*$ | 8.46                    | 1.62                        | 0.105                 |
| C50 - C51         | $\sigma$ | C51 - N52            | $\sigma^*$ | 8.23                    | 1.61                        | 0.103                 |
| C43 - H63         | $\sigma$ | C45 - C48            | $\sigma^*$ | 7.35                    | 0.97                        | 0.076                 |
| C43 - H63         | $\sigma$ | C39 - C41            | $\sigma^*$ | 6.42                    | 1.1                         | 0.075                 |
| C43 - C48         | $\sigma$ | C41 - C43            | $\sigma^*$ | 6                       | 1.3                         | 0.079                 |
| C15 - C16         | $\sigma$ | C3 - C16             | $\sigma^*$ | 5.99                    | 1.25                        | 0.077                 |

|            |          |           |            |       |      |       |
|------------|----------|-----------|------------|-------|------|-------|
| C47 - C58  | $\sigma$ | C46 - C47 | $\sigma^*$ | 5.76  | 1.3  | 0.077 |
| C15 - C16  | $\sigma$ | C11 - C16 | $\sigma^*$ | 4.98  | 1.26 | 0.071 |
| C1 - H7    | $\sigma$ | C2 - C3   | $\sigma^*$ | 4.69  | 1.08 | 0.064 |
| C45 - C48  | $\sigma$ | C43 - C48 | $\sigma^*$ | 3.96  | 1.27 | 0.063 |
| C14 - C15  | $\sigma$ | C14 - C25 | $\sigma^*$ | 3.82  | 1.2  | 0.06  |
| C28 - N35  | $\sigma$ | C29 - C36 | $\sigma^*$ | 2.97  | 1.31 | 0.056 |
| C11 - C16  | $\sigma$ | C15 - H19 | $\sigma^*$ | 2.73  | 1.08 | 0.049 |
| C39 - H42  | $\sigma$ | C39 - C41 | $\sigma^*$ | 1.99  | 1.1  | 0.042 |
| C56 - C161 | $\sigma$ | C55 - C56 | $\sigma^*$ | 0.51  | 1.31 | 0.023 |
| N35        | LP (1)   | C27 - C29 | $\pi^*$    | 48.57 | 0.32 | 0.114 |
| N20        | LP (1)   | C1 - C2   | $\pi^*$    | 43.04 | 0.31 | 0.104 |
| N20        | LP (1)   | C11 - C16 | $\pi^*$    | 42.18 | 0.3  | 0.103 |
| S38        | LP (2)   | C36 - C37 | $\pi^*$    | 27.26 | 0.27 | 0.078 |
| S38        | LP (2)   | C39 - C41 | $\pi^*$    | 21.58 | 0.28 | 0.07  |
| C162       | LP (3)   | C56 - C57 | $\pi^*$    | 16.44 | 0.31 | 0.071 |
| C161       | LP (3)   | C56 - C57 | $\pi^*$    | 16.22 | 0.31 | 0.07  |
| O34        | LP (2)   | C32 - N33 | $\pi^*$    | 0.9   | 0.39 | 0.017 |
| O34        | LP (2)   | C28 - N35 | $\sigma^*$ | 29.26 | 0.67 | 0.127 |
| O49        | LP (2)   | C45 - C48 | $\sigma^*$ | 21.01 | 0.73 | 0.112 |
| O49        | LP (2)   | C45 - C47 | $\sigma^*$ | 20.85 | 0.75 | 0.113 |
| O34        | LP (2)   | C26 - C28 | $\sigma^*$ | 19.72 | 0.74 | 0.11  |
| N54        | LP (1)   | C50 - C53 | $\sigma^*$ | 12.7  | 1.04 | 0.103 |
| N52        | LP (1)   | C50 - C51 | $\sigma^*$ | 12.67 | 1.04 | 0.103 |
| N20        | LP (1)   | C21 - H22 | $\sigma^*$ | 5.98  | 0.64 | 0.061 |
| C162       | LP (2)   | C56 - C57 | $\sigma^*$ | 5.64  | 0.86 | 0.062 |
| C162       | LP (2)   | C57 - C58 | $\sigma^*$ | 4.47  | 0.89 | 0.056 |
| N20        | LP (1)   | C21 - H23 | $\sigma^*$ | 4.4   | 0.64 | 0.052 |
| O49        | LP (1)   | C45 - C48 | $\sigma^*$ | 2.98  | 1.16 | 0.053 |
| S38        | LP (1)   | C39 - C41 | $\sigma^*$ | 2.29  | 1.24 | 0.048 |
| C162       | LP (1)   | C56 - C57 | $\sigma^*$ | 1.86  | 1.48 | 0.047 |
| C161       | LP (1)   | C55 - C56 | $\sigma^*$ | 1.74  | 1.5  | 0.046 |
| C162       | LP (2)   | C47 - C58 | $\sigma^*$ | 0.54  | 0.92 | 0.02  |

**Table S30:** Natural bond orbital (NBO) analysis of Compound CTP4.

| Donor( <i>i</i> ) | Type  | Acceptor( <i>j</i> ) | Type    | $E^{(2)}$<br>[kcal/mol] | $E_{(j)} - E_{(i)}$<br>[a.u.] | $F_{(i,j)}$<br>[a.u.] |
|-------------------|-------|----------------------|---------|-------------------------|-------------------------------|-----------------------|
| C11 - C16         | $\pi$ | C14 - C15            | $\pi^*$ | 26.58                   | 0.29                          | 0.079                 |
| C1 - C2           | $\pi$ | C5 - C6              | $\pi^*$ | 24.8                    | 0.3                           | 0.077                 |
| C5 - C6           | $\pi$ | C3 - C4              | $\pi^*$ | 23.93                   | 0.3                           | 0.076                 |
| C43 - C48         | $\pi$ | C45 - O49            | $\pi^*$ | 21.97                   | 0.32                          | 0.076                 |
| C5 - C6           | $\pi$ | C1 - C2              | $\pi^*$ | 19.71                   | 0.29                          | 0.068                 |

|           |          |           |            |       |      |       |
|-----------|----------|-----------|------------|-------|------|-------|
| C14 - C15 | $\pi$    | C11 - C16 | $\pi^*$    | 17.99 | 0.29 | 0.068 |
| C47 - C58 | $\pi$    | C45 - O49 | $\pi^*$    | 16.7  | 0.31 | 0.068 |
| C14 - C15 | $\pi$    | C25 - C26 | $\pi^*$    | 14.75 | 0.29 | 0.058 |
| C25 - C26 | $\pi$    | C27 - C29 | $\pi^*$    | 11.5  | 0.3  | 0.053 |
| C27 - C29 | $\pi$    | C36 - C37 | $\pi^*$    | 10.58 | 0.3  | 0.051 |
| C44 - C50 | $\pi$    | C46 - C55 | $\pi^*$    | 9.8   | 0.33 | 0.052 |
| C25 - C26 | $\pi$    | C14 - C15 | $\pi^*$    | 5.25  | 0.32 | 0.038 |
| C45 - O49 | $\pi$    | C43 - C48 | $\pi^*$    | 2.94  | 0.44 | 0.034 |
| C25 - C26 | $\pi$    | C25 - C26 | $\pi^*$    | 1.82  | 0.31 | 0.021 |
| C53 - N54 | $\pi$    | C51 - N52 | $\pi^*$    | 0.64  | 0.47 | 0.016 |
| C43 - H61 | $\sigma$ | C44 - C48 | $\sigma^*$ | 9.24  | 1.01 | 0.086 |
| C57 - C64 | $\sigma$ | C64 - N65 | $\sigma^*$ | 9     | 1.62 | 0.108 |
| C56 - C62 | $\sigma$ | C62 - N63 | $\sigma^*$ | 8.96  | 1.62 | 0.108 |
| C64 - N65 | $\sigma$ | C57 - C64 | $\sigma^*$ | 8.67  | 1.57 | 0.105 |
| C43 - C48 | $\sigma$ | C44 - C48 | $\sigma^*$ | 6.32  | 1.25 | 0.079 |
| C44 - C48 | $\sigma$ | C43 - C48 | $\sigma^*$ | 6.26  | 1.3  | 0.081 |
| C15 - C16 | $\sigma$ | C3 - C16  | $\sigma^*$ | 5.99  | 1.26 | 0.077 |
| C27 - H30 | $\sigma$ | C29 - N35 | $\sigma^*$ | 5.83  | 0.98 | 0.068 |
| C43 - H61 | $\sigma$ | C39 - C41 | $\sigma^*$ | 4.99  | 1.09 | 0.066 |
| C58 - H60 | $\sigma$ | C56 - C57 | $\sigma^*$ | 4.62  | 1.06 | 0.063 |
| S38 - C41 | $\sigma$ | C39 - H42 | $\sigma^*$ | 3.97  | 1.09 | 0.059 |
| C44 - C46 | $\sigma$ | C50 - C53 | $\sigma^*$ | 3.6   | 1.19 | 0.059 |
| C28 - N35 | $\sigma$ | C29 - C36 | $\sigma^*$ | 2.99  | 1.31 | 0.056 |
| C44 - C46 | $\sigma$ | C44 - C48 | $\sigma^*$ | 1.97  | 1.18 | 0.043 |
| C43 - H61 | $\sigma$ | C41 - C43 | $\sigma^*$ | 0.52  | 1.06 | 0.021 |
| N35       | LP (1)   | C27 - C29 | $\pi^*$    | 48.54 | 0.32 | 0.114 |
| N20       | LP (1)   | C1 - C2   | $\pi^*$    | 43.06 | 0.31 | 0.104 |
| N20       | LP (1)   | C11 - C16 | $\pi^*$    | 42.18 | 0.3  | 0.103 |
| S38       | LP (2)   | C36 - C37 | $\pi^*$    | 26.34 | 0.27 | 0.077 |
| S38       | LP (2)   | C39 - C41 | $\pi^*$    | 23.61 | 0.27 | 0.072 |
| O34       | LP (2)   | C32 - N33 | $\pi^*$    | 0.9   | 0.39 | 0.017 |
| O34       | LP (2)   | C28 - N35 | $\sigma^*$ | 29.25 | 0.67 | 0.127 |
| O49       | LP (2)   | C45 - C48 | $\sigma^*$ | 22.47 | 0.72 | 0.115 |
| O49       | LP (2)   | C45 - C47 | $\sigma^*$ | 21.95 | 0.74 | 0.115 |
| O34       | LP (2)   | C26 - C28 | $\sigma^*$ | 19.7  | 0.74 | 0.11  |
| N54       | LP (1)   | C50 - C53 | $\sigma^*$ | 12.72 | 1.04 | 0.103 |
| N52       | LP (1)   | C50 - C51 | $\sigma^*$ | 12.66 | 1.04 | 0.103 |
| N33       | LP (1)   | C26 - C32 | $\sigma^*$ | 12.26 | 1.06 | 0.102 |
| N20       | LP (1)   | C21 - H22 | $\sigma^*$ | 5.32  | 0.64 | 0.058 |
| N20       | LP (1)   | C21 - H23 | $\sigma^*$ | 5.16  | 0.64 | 0.057 |
| O34       | LP (1)   | C26 - C28 | $\sigma^*$ | 2.82  | 1.18 | 0.052 |

|     |        |           |            |      |      |       |
|-----|--------|-----------|------------|------|------|-------|
| S38 | LP (1) | C36 - C37 | $\sigma^*$ | 2.77 | 1.24 | 0.052 |
| O49 | LP (1) | C45 - C48 | $\sigma^*$ | 2.62 | 1.15 | 0.05  |
| O49 | LP (1) | C45 - C47 | $\sigma^*$ | 2.55 | 1.16 | 0.049 |
| O34 | LP (1) | C28 - N35 | $\sigma^*$ | 1.45 | 1.11 | 0.036 |
| O34 | LP (2) | C29 - N35 | $\sigma^*$ | 0.57 | 0.71 | 0.019 |

**Table S31:** Natural bond orbital (NBO) analysis of Compound **CTP5**.

| Donor( <i>i</i> ) | Type     | Acceptor( <i>j</i> ) | Type       | $E^{(2)}$<br>[kcal/mol] | $E_{(j)}-E_{(i)}$<br>[a.u] | $F_{(i,j)}$<br>[a.u] |
|-------------------|----------|----------------------|------------|-------------------------|----------------------------|----------------------|
| C46 - C55         | $\pi$    | C56 - C57            | $\pi^*$    | 27.52                   | 0.28                       | 0.078                |
| C47 - C58         | $\pi$    | C56 - C57            | $\pi^*$    | 25.81                   | 0.27                       | 0.075                |
| C5 - C6           | $\pi$    | C3 - C4              | $\pi^*$    | 23.93                   | 0.3                        | 0.076                |
| C11 - C16         | $\pi$    | C3 - C4              | $\pi^*$    | 22.51                   | 0.3                        | 0.074                |
| C36 - C37         | $\pi$    | C39 - C41            | $\pi^*$    | 19.76                   | 0.31                       | 0.072                |
| C1 - C2           | $\pi$    | C3 - C4              | $\pi^*$    | 18.42                   | 0.31                       | 0.068                |
| C11 - C16         | $\pi$    | C12 - C13            | $\pi^*$    | 17.98                   | 0.29                       | 0.067                |
| C3 - C4           | $\pi$    | C11 - C16            | $\pi^*$    | 15.82                   | 0.28                       | 0.062                |
| C36 - C37         | $\pi$    | C27 - C29            | $\pi^*$    | 13.99                   | 0.32                       | 0.06                 |
| C25 - C26         | $\pi$    | C27 - C29            | $\pi^*$    | 11.5                    | 0.3                        | 0.053                |
| C44 - C50         | $\pi$    | C46 - C55            | $\pi^*$    | 9.93                    | 0.33                       | 0.052                |
| N62 - O64         | $\pi$    | N62 - O64            | $\pi^*$    | 6.5                     | 0.4                        | 0.054                |
| N65 - O66         | $\pi$    | C56 - C57            | $\pi^*$    | 3.04                    | 0.48                       | 0.038                |
| C25 - C26         | $\pi$    | C25 - C26            | $\pi^*$    | 1.8                     | 0.31                       | 0.021                |
| C51 - N52         | $\pi$    | C53 - N54            | $\pi^*$    | 0.63                    | 0.48                       | 0.016                |
| C43 - H61         | $\sigma$ | C44 - C48            | $\sigma^*$ | 9.23                    | 1.01                       | 0.086                |
| C26 - C32         | $\sigma$ | C32 - N33            | $\sigma^*$ | 8.46                    | 1.62                       | 0.105                |
| C32 - N33         | $\sigma$ | C26 - C32            | $\sigma^*$ | 8                       | 1.59                       | 0.101                |
| C43 - C48         | $\sigma$ | C44 - C48            | $\sigma^*$ | 6.34                    | 1.25                       | 0.079                |
| C55 - C56         | $\sigma$ | C56 - C57            | $\sigma^*$ | 6                       | 1.29                       | 0.079                |
| C15 - C16         | $\sigma$ | C3 - C16             | $\sigma^*$ | 5.98                    | 1.26                       | 0.077                |
| C15 - C16         | $\sigma$ | C11 - C16            | $\sigma^*$ | 4.97                    | 1.26                       | 0.071                |
| C14 - C15         | $\sigma$ | C15 - C16            | $\sigma^*$ | 4.51                    | 1.3                        | 0.069                |
| S38 - C41         | $\sigma$ | C39 - H42            | $\sigma^*$ | 3.97                    | 1.09                       | 0.059                |
| C13 - C14         | $\sigma$ | C14 - C25            | $\sigma^*$ | 3.85                    | 1.19                       | 0.06                 |
| C28 - N35         | $\sigma$ | C29 - C36            | $\sigma^*$ | 2.98                    | 1.31                       | 0.056                |
| C29 - C36         | $\sigma$ | C25 - C27            | $\sigma^*$ | 2.18                    | 1.28                       | 0.047                |
| C45 - C48         | $\sigma$ | C45 - O49            | $\sigma^*$ | 1.96                    | 1.25                       | 0.045                |
| C56 - N62         | $\sigma$ | C56 - C57            | $\sigma^*$ | 1                       | 1.36                       | 0.033                |
| C43 - H61         | $\sigma$ | C41 - C43            | $\sigma^*$ | 0.52                    | 1.06                       | 0.021                |
| O67               | LP (3)   | N65 - O66            | $\pi^*$    | 189.12                  | 0.17                       | 0.16                 |
| O63               | LP (3)   | N62 - O64            | $\pi^*$    | 163.13                  | 0.18                       | 0.155                |

|     |        |           |            |       |      |       |
|-----|--------|-----------|------------|-------|------|-------|
| N35 | LP (1) | C27 - C29 | $\pi^*$    | 48.34 | 0.32 | 0.113 |
| N20 | LP (1) | C1 - C2   | $\pi^*$    | 43.07 | 0.31 | 0.104 |
| N20 | LP (1) | C11 - C16 | $\pi^*$    | 42.19 | 0.3  | 0.103 |
| S38 | LP (2) | C36 - C37 | $\pi^*$    | 26.4  | 0.27 | 0.077 |
| S38 | LP (2) | C39 - C41 | $\pi^*$    | 23.54 | 0.27 | 0.072 |
| O63 | LP (2) | N62 - O64 | $\pi^*$    | 2.26  | 0.2  | 0.022 |
| O34 | LP (2) | C32 - N33 | $\pi^*$    | 0.9   | 0.39 | 0.017 |
| O63 | LP (2) | C56 - C57 | $\pi^*$    | 0.86  | 0.31 | 0.016 |
| O66 | LP (2) | C56 - C57 | $\pi^*$    | 0.58  | 0.31 | 0.013 |
| O34 | LP (2) | C28 - N35 | $\sigma^*$ | 29.26 | 0.67 | 0.127 |
| O49 | LP (2) | C45 - C48 | $\sigma^*$ | 22.44 | 0.72 | 0.115 |
| O66 | LP (2) | N65 - O67 | $\sigma^*$ | 20.81 | 0.75 | 0.113 |
| O64 | LP (2) | N62 - O63 | $\sigma^*$ | 20.51 | 0.76 | 0.113 |
| O34 | LP (2) | C26 - C28 | $\sigma^*$ | 19.72 | 0.74 | 0.11  |
| O64 | LP (2) | C56 - N62 | $\sigma^*$ | 16.36 | 0.57 | 0.086 |
| O67 | LP (2) | C57 - N65 | $\sigma^*$ | 16.14 | 0.57 | 0.086 |
| N54 | LP (1) | C50 - C53 | $\sigma^*$ | 12.72 | 1.04 | 0.103 |
| N33 | LP (1) | C26 - C32 | $\sigma^*$ | 12.26 | 1.06 | 0.102 |
| O67 | LP (3) | N65 - O67 | $\sigma^*$ | 8.49  | 0.73 | 0.081 |
| N20 | LP (1) | C21 - H23 | $\sigma^*$ | 5.3   | 0.64 | 0.057 |
| O67 | LP (1) | C57 - N65 | $\sigma^*$ | 3.98  | 1.08 | 0.06  |
| O66 | LP (1) | N65 - O67 | $\sigma^*$ | 2.91  | 1.26 | 0.055 |
| O63 | LP (3) | N62 - O63 | $\sigma^*$ | 1.63  | 0.74 | 0.036 |
| O66 | LP (2) | C56 - C57 | $\sigma^*$ | 0.56  | 0.85 | 0.02  |

**Table S32:** Natural bond orbital (NBO) analysis of Compound CTP6.

| Donor( <i>i</i> ) | Type  | Acceptor( <i>j</i> ) | Type    | $E^{(2)}$<br>[kcal/mol] | $E_{(j)} \cdot E_{(i)}$<br>[a.u] | $F_{(i,j)}$<br>[a.u] |
|-------------------|-------|----------------------|---------|-------------------------|----------------------------------|----------------------|
| C11 - C16         | $\pi$ | C14 - C15            | $\pi^*$ | 26.5                    | 0.29                             | 0.079                |
| C1 - C2           | $\pi$ | C5 - C6              | $\pi^*$ | 24.82                   | 0.3                              | 0.077                |
| C43 - C48         | $\pi$ | C45 - O49            | $\pi^*$ | 21.52                   | 0.32                             | 0.076                |
| C5 - C6           | $\pi$ | C1 - C2              | $\pi^*$ | 19.71                   | 0.29                             | 0.068                |
| C11 - C16         | $\pi$ | C12 - C13            | $\pi^*$ | 17.99                   | 0.29                             | 0.067                |
| C3 - C4           | $\pi$ | C11 - C16            | $\pi^*$ | 15.82                   | 0.28                             | 0.062                |
| C14 - C15         | $\pi$ | C25 - C26            | $\pi^*$ | 14.47                   | 0.29                             | 0.058                |
| C25 - C26         | $\pi$ | C27 - C29            | $\pi^*$ | 11.42                   | 0.3                              | 0.053                |
| C27 - C29         | $\pi$ | C36 - C37            | $\pi^*$ | 10.26                   | 0.3                              | 0.05                 |
| C43 - C48         | $\pi$ | C39 - C41            | $\pi^*$ | 9.59                    | 0.31                             | 0.05                 |
| C25 - C26         | $\pi$ | C14 - C15            | $\pi^*$ | 5.16                    | 0.32                             | 0.037                |
| C45 - O49         | $\pi$ | C47 - C58            | $\pi^*$ | 4.13                    | 0.43                             | 0.041                |
| C45 - O49         | $\pi$ | C43 - C48            | $\pi^*$ | 2.92                    | 0.44                             | 0.033                |

|           |          |           |            |       |      |       |
|-----------|----------|-----------|------------|-------|------|-------|
| C44 - C50 | $\pi$    | C44 - C50 | $\pi^*$    | 1.21  | 0.33 | 0.018 |
| C53 - N54 | $\pi$    | C51 - N52 | $\pi^*$    | 0.63  | 0.47 | 0.015 |
| C43 - H61 | $\sigma$ | C44 - C48 | $\sigma^*$ | 9.3   | 1.01 | 0.087 |
| C26 - C32 | $\sigma$ | C32 - N33 | $\sigma^*$ | 8.46  | 1.62 | 0.105 |
| C51 - N52 | $\sigma$ | C50 - C51 | $\sigma^*$ | 8.22  | 1.57 | 0.102 |
| C43 - C48 | $\sigma$ | C44 - C48 | $\sigma^*$ | 6.3   | 1.25 | 0.079 |
| C50 - C53 | $\sigma$ | C44 - C50 | $\sigma^*$ | 6.03  | 1.33 | 0.08  |
| C44 - C50 | $\sigma$ | C50 - C53 | $\sigma^*$ | 5.88  | 1.28 | 0.077 |
| C46 - C55 | $\sigma$ | C46 - C47 | $\sigma^*$ | 5.5   | 1.3  | 0.076 |
| C13 - H18 | $\sigma$ | C14 - C15 | $\sigma^*$ | 4.74  | 1.09 | 0.064 |
| C25 - C27 | $\sigma$ | C26 - C32 | $\sigma^*$ | 3.99  | 1.24 | 0.063 |
| C47 - C58 | $\sigma$ | C45 - C47 | $\sigma^*$ | 3.43  | 1.19 | 0.058 |
| C26 - C28 | $\sigma$ | C28 - O34 | $\sigma^*$ | 2.9   | 1.3  | 0.055 |
| C44 - C48 | $\sigma$ | C45 - O49 | $\sigma^*$ | 2.71  | 1.3  | 0.053 |
| C56 - C62 | $\sigma$ | C55 - C56 | $\sigma^*$ | 1.94  | 1.26 | 0.044 |
| C62 - F67 | $\sigma$ | C55 - C56 | $\sigma^*$ | 1.05  | 1.64 | 0.037 |
| C63 - F66 | $\sigma$ | C63 - F65 | $\sigma^*$ | 0.5   | 1.34 | 0.024 |
| N35       | LP (1)   | C27 - C29 | $\pi^*$    | 48.49 | 0.32 | 0.114 |
| N20       | LP (1)   | C1 - C2   | $\pi^*$    | 43.09 | 0.31 | 0.104 |
| N20       | LP (1)   | C11 - C16 | $\pi^*$    | 42.14 | 0.3  | 0.103 |
| S38       | LP (2)   | C36 - C37 | $\pi^*$    | 26.15 | 0.27 | 0.077 |
| S38       | LP (2)   | C39 - C41 | $\pi^*$    | 23.63 | 0.27 | 0.073 |
| O34       | LP (2)   | C32 - N33 | $\pi^*$    | 0.9   | 0.39 | 0.017 |
| F69       | LP (2)   | C56 - C57 | $\pi^*$    | 0.88  | 0.46 | 0.02  |
| F65       | LP (2)   | C56 - C57 | $\pi^*$    | 0.78  | 0.46 | 0.019 |
| O34       | LP (2)   | C28 - N35 | $\sigma^*$ | 29.24 | 0.67 | 0.127 |
| O49       | LP (2)   | C45 - C48 | $\sigma^*$ | 22.61 | 0.72 | 0.115 |
| O49       | LP (2)   | C45 - C47 | $\sigma^*$ | 21.64 | 0.74 | 0.115 |
| O34       | LP (2)   | C26 - C28 | $\sigma^*$ | 19.7  | 0.74 | 0.11  |
| N54       | LP (1)   | C50 - C53 | $\sigma^*$ | 12.7  | 1.04 | 0.103 |
| F65       | LP (3)   | C63 - F64 | $\sigma^*$ | 11.86 | 0.71 | 0.083 |
| F67       | LP (3)   | C62 - F69 | $\sigma^*$ | 10.95 | 0.72 | 0.08  |
| F66       | LP (2)   | C57 - C63 | $\sigma^*$ | 7.01  | 0.81 | 0.068 |
| F67       | LP (2)   | C56 - C62 | $\sigma^*$ | 6.87  | 0.81 | 0.067 |
| N20       | LP (1)   | C21 - H22 | $\sigma^*$ | 5.74  | 0.64 | 0.06  |
| N20       | LP (1)   | C21 - H23 | $\sigma^*$ | 4.71  | 0.64 | 0.054 |
| F65       | LP (2)   | C63 - F64 | $\sigma^*$ | 3.99  | 0.72 | 0.048 |
| O34       | LP (1)   | C26 - C28 | $\sigma^*$ | 2.82  | 1.18 | 0.052 |
| O34       | LP (1)   | C28 - N35 | $\sigma^*$ | 1.45  | 1.11 | 0.036 |
| F66       | LP (1)   | C57 - C63 | $\sigma^*$ | 0.5   | 1.45 | 0.024 |

**Table S33:** NBO analysis of CTPR and CTP1-CTP6 by using M06/6-311G(d,p).

| Compounds | Donor( <i>i</i> ) | Type     | Acceptor( <i>j</i> ) | Type       | $E^{(2)}$<br>[kcal/mol] | $E(j)-E(i)$<br>[a.u] | $F(i,j)$<br>[a.u] |
|-----------|-------------------|----------|----------------------|------------|-------------------------|----------------------|-------------------|
| CTPR      | C7-C9             | $\pi$    | C 32-C33             | $\pi^*$    | 16.38                   | 0.28                 | 0.061             |
|           | C16-C18           | $\pi$    | C 13-C15             | $\pi^*$    | 23.56                   | 0.3                  | 0.075             |
|           | C33-C35           | $\sigma$ | C9-C32               | $\sigma^*$ | 5.37                    | 1.2                  | 0.072             |
|           | C7-C9             | $\sigma$ | C5-C9                | $\sigma^*$ | 4.6                     | 1.27                 | 0.068             |
|           | N1                | LP (1)   | C2-C4                | $\pi^*$    | 24.86                   | 0.29                 | 0.079             |
|           | S34               | LP (1)   | C32-C33              | $\sigma^*$ | 2.79                    | 1.24                 | 0.052             |
| CTP1      | C2-C4             | $\pi$    | C7-C9                | $\pi^*$    | 25.45                   | 0.3                  | 0.078             |
|           | C32 -C33          | $\pi$    | C7-C9                | $\pi^*$    | 11.56                   | 0.32                 | 0.056             |
|           | C37-B39           | $\sigma$ | C35-C37              | $\sigma^*$ | 7.25                    | 1.17                 | 0.082             |
|           | C57-C64           | $\sigma$ | C64-N65              | $\sigma^*$ | 8.85                    | 1.61                 | 0.107             |
|           | N1                | LP (1)   | C 2-C 4              | $\pi^*$    | 27.58                   | 0.29                 | 0.083             |
|           | N63               | LP (1)   | C47-C62              | $\sigma^*$ | 11.87                   | 1.06                 | 0.1               |
| CTP2      | C60-C61           | $\pi$    | C62-C65              | $\pi^*$    | 20.3                    | 0.29                 | 0.071             |
|           | C13-C15           | $\pi$    | C 9-C11              | $\pi^*$    | 19.4                    | 0.3                  | 0.07              |
|           | C3-H7             | $\sigma$ | C 4-S 5              | $\sigma^*$ | 5.8                     | 0.74                 | 0.059             |
|           | C66-C72           | $\sigma$ | C72-N73              | $\sigma^*$ | 8.86                    | 1.61                 | 0.107             |
|           | N28               | LP (1)   | C13-C15              | $\pi^*$    | 25.54                   | 0.29                 | 0.08              |
|           | S5                | LP (1)   | C 1-C 2              | $\sigma^*$ | 2.42                    | 1.25                 | 0.049             |
| CTP3      | C38-C40           | $\pi$    | C43-C45              | $\pi^*$    | 24.55                   | 0.29                 | 0.076             |
|           | C32-C34           | $\pi$    | C38-C40              | $\pi^*$    | 12.34                   | 0.32                 | 0.059             |
|           | C30-H33           | $\sigma$ | C29-S31              | $\sigma^*$ | 5.81                    | 0.74                 | 0.059             |
|           | C25-C26           | $\sigma$ | C23-C26              | $\sigma^*$ | 5.36                    | 1.28                 | 0.074             |
|           | N73               | LP (1)   | C53-C60              | $\pi^*$    | 36.91                   | 0.3                  | 0.098             |
|           | S31               | LP (1)   | C29-C30              | $\sigma^*$ | 2.48                    | 1.25                 | 0.05              |
| CTP4      | C50-C52           | $\pi$    | C45-C47              | $\pi^*$    | 25.59                   | 0.3                  | 0.079             |
|           | C42-C43           | $\pi$    | C45-C47              | $\pi^*$    | 10.97                   | 0.32                 | 0.057             |
|           | C30-H33           | $\sigma$ | C29-S31              | $\sigma^*$ | 6                       | 0.73                 | 0.059             |
|           | C55-C67           | $\sigma$ | C55-C65              | $\sigma^*$ | 5.97                    | 1.29                 | 0.079             |
|           | N74               | LP (1)   | C50-C52              | $\pi^*$    | 32.39                   | 0.32                 | 0.094             |
|           | N74               | LP (1)   | C54-C56              | $\sigma^*$ | 5.04                    | 0.85                 | 0.062             |
| CTP5      | C40-C41           | $\pi$    | C35-C37              | $\pi^*$    | 14.71                   | 0.29                 | 0.064             |
|           | C35-C37           | $\pi$    | C32-C33              | $\pi^*$    | 15.43                   | 0.32                 | 0.064             |
|           | N1-C22            | $\sigma$ | C22-C23              | $\sigma^*$ | 1.68                    | 1.36                 | 0.043             |
|           | C40-S42           | $\sigma$ | C40-C41              | $\sigma^*$ | 0.55                    | 1.25                 | 0.023             |
|           | N1                | LP (1)   | C2-C4                | $\pi^*$    | 28.23                   | 0.29                 | 0.084             |
|           | N75               | LP (1)   | C61-C74              | $\sigma^*$ | 11.87                   | 1.06                 | 0.1               |
| CTP6      | C40-C41           | $\pi$    | C35-C37              | $\pi^*$    | 14.71                   | 0.29                 | 0.064             |
|           | C43-C45           | $\pi$    | C48-C50              | $\pi^*$    | 26.1                    | 0.3                  | 0.079             |
|           | S34-C37           | $\sigma$ | C35-S42              | $\sigma^*$ | 5.22                    | 0.9                  | 0.061             |

|         |          |         |            |       |      |       |
|---------|----------|---------|------------|-------|------|-------|
| C71-C76 | $\sigma$ | C76-N77 | $\sigma^*$ | 8.86  | 1.61 | 0.107 |
| S42     | LP (2)   | C35-C37 | $\pi^*$    | 25.36 | 0.26 | 0.075 |
| N75     | LP (1)   | C61-C74 | $\sigma^*$ | 11.87 | 1.06 | 0.1   |

**Table S34:** Dipole polarizability and major contributing tensor (*esu*) of the studied chromophores at diffused basis set.

| Dipole Moment                           | CTPR                                      | CTP1                                      | CTP2                                      | CTP3                                      | CTP4                                      | CTP5                                      | CTP6                                      |
|-----------------------------------------|-------------------------------------------|-------------------------------------------|-------------------------------------------|-------------------------------------------|-------------------------------------------|-------------------------------------------|-------------------------------------------|
| $\mu_x$                                 | -1.8264                                   | -0.3612                                   | -0.9013                                   | 0.4224                                    | -5.5055                                   | -5.2484                                   | -3.2211                                   |
| $\mu_y$                                 | -11.5239                                  | -9.2007                                   | -9.9746                                   | -8.6094                                   | -1.9319                                   | -2.4162                                   | -5.8020                                   |
| $\mu_z$                                 | -4.9400                                   | 0.4820                                    | -0.9637                                   | -1.4843                                   | -3.5876                                   | -3.3901                                   | -1.8841                                   |
| $\mu_{total}$                           | <b>12.6704</b>                            | <b>9.2204</b>                             | <b>10.0615</b>                            | <b>8.7466</b>                             | <b>6.8493</b>                             | <b>6.6990</b>                             | <b>6.8985</b>                             |
| Polarizability                          |                                           |                                           |                                           |                                           |                                           |                                           |                                           |
| $\alpha_{xx}$                           | $9.303 \times 10^{-23}$                   | $1.503 \times 10^{-22}$                   | $1.438 \times 10^{-22}$                   | $1.531 \times 10^{-22}$                   | $1.605 \times 10^{-22}$                   | $1.623 \times 10^{-22}$                   | $1.569 \times 10^{-22}$                   |
| $\alpha_{yy}$                           | $7.711 \times 10^{-23}$                   | $1.707 \times 10^{-22}$                   | $1.574 \times 10^{-22}$                   | $1.715 \times 10^{-22}$                   | $1.876 \times 10^{-22}$                   | $1.829 \times 10^{-22}$                   | $1.777 \times 10^{-22}$                   |
| $\alpha_{zz}$                           | $3.963 \times 10^{-23}$                   | $7.538 \times 10^{-23}$                   | $7.697 \times 10^{-23}$                   | $8.227 \times 10^{-23}$                   | $8.222 \times 10^{-23}$                   | $8.117 \times 10^{-23}$                   | $7.991 \times 10^{-23}$                   |
| $\alpha_{total}$                        | <b><math>6.992 \times 10^{-23}</math></b> | <b><math>1.321 \times 10^{-22}</math></b> | <b><math>1.260 \times 10^{-22}</math></b> | <b><math>1.356 \times 10^{-22}</math></b> | <b><math>1.434 \times 10^{-22}</math></b> | <b><math>1.421 \times 10^{-22}</math></b> | <b><math>1.381 \times 10^{-22}</math></b> |
| 2 <sup>nd</sup> Hyper pol.              |                                           |                                           |                                           |                                           |                                           |                                           |                                           |
| $\gamma_X$                              | $3.777 \times 10^{-34}$                   | $2.226 \times 10^{-33}$                   | $2.031 \times 10^{-33}$                   | $2.317 \times 10^{-33}$                   | $2.958 \times 10^{-33}$                   | $2.909 \times 10^{-33}$                   | $2.546 \times 10^{-33}$                   |
| $\gamma_Y$                              | $1.002 \times 10^{-34}$                   | $2.299 \times 10^{-33}$                   | $2.482 \times 10^{-33}$                   | $2.679 \times 10^{-33}$                   | $3.021 \times 10^{-33}$                   | $2.927 \times 10^{-33}$                   | $2.558 \times 10^{-33}$                   |
| $\gamma_Z$                              | $2.124 \times 10^{-35}$                   | $1.159 \times 10^{-33}$                   | $1.087 \times 10^{-34}$                   | $-5.468 \times 10^{-35}$                  | $1.647 \times 10^{-34}$                   | $1.539 \times 10^{-34}$                   | $1.247 \times 10^{-34}$                   |
| <i>Average</i> $\langle\gamma\rangle$   | <b><math>4.993 \times 10^{-34}</math></b> | <b><math>4.641 \times 10^{-33}</math></b> | <b><math>4.623 \times 10^{-33}</math></b> | <b><math>4.942 \times 10^{-33}</math></b> | <b><math>6.144 \times 10^{-33}</math></b> | <b><math>5.991 \times 10^{-33}</math></b> | <b><math>5.229 \times 10^{-33}</math></b> |
| <i>Magnitude of <math>\gamma</math></i> | <b><math>3.914 \times 10^{-34}</math></b> | <b><math>3.202 \times 10^{-33}</math></b> | <b><math>3.209 \times 10^{-33}</math></b> | <b><math>3.543 \times 10^{-33}</math></b> | <b><math>4.231 \times 10^{-33}</math></b> | <b><math>4.130 \times 10^{-33}</math></b> | <b><math>3.611 \times 10^{-33}</math></b> |

**Table S35:** The computed first hyperpolarizability ( $\beta_{total}$ ) and major contributing tensors (*esu*) of studied chromophores at diffused basis set.

| Hyper pol       | CTPR                                      | CTP1                                      | CTP2                                      | CTP3                                      |
|-----------------|-------------------------------------------|-------------------------------------------|-------------------------------------------|-------------------------------------------|
| $\beta_{xxx}$   | $-9.291 \times 10^{-29}$                  | $-2.853 \times 10^{-28}$                  | $-2.346 \times 10^{-28}$                  | $-2.904 \times 10^{-28}$                  |
| $\beta_{xxy}$   | $-3.451 \times 10^{-29}$                  | $1.687 \times 10^{-28}$                   | $1.489 \times 10^{-28}$                   | $1.979 \times 10^{-28}$                   |
| $\beta_{xyy}$   | $1.793 \times 10^{-29}$                   | $-1.825 \times 10^{-28}$                  | $-1.817 \times 10^{-28}$                  | $-2.075 \times 10^{-28}$                  |
| $\beta_{yyy}$   | $-1.851 \times 10^{-30}$                  | $2.548 \times 10^{-28}$                   | $2.691 \times 10^{-28}$                   | $2.236 \times 10^{-28}$                   |
| $\beta_{xxz}$   | $-8.571 \times 10^{-30}$                  | $9.975 \times 10^{-30}$                   | $1.013 \times 10^{-29}$                   | $1.150 \times 10^{-29}$                   |
| $\beta_{yyz}$   | $-2.221 \times 10^{-30}$                  | $3.795 \times 10^{-29}$                   | $2.843 \times 10^{-29}$                   | $4.965 \times 10^{-29}$                   |
| $\beta_{xzz}$   | $1.793 \times 10^{-30}$                   | $2.506 \times 10^{-30}$                   | $6.147 \times 10^{-30}$                   | $4.747 \times 10^{-30}$                   |
| $\beta_{yzz}$   | $1.571 \times 10^{-30}$                   | $-3.756 \times 10^{-30}$                  | $-5.277 \times 10^{-30}$                  | $-7.268 \times 10^{-30}$                  |
| $\beta_{zzz}$   | $2.350 \times 10^{-31}$                   | $9.787 \times 10^{-31}$                   | $4.936 \times 10^{-30}$                   | $6.439 \times 10^{-30}$                   |
| $\beta_{total}$ | <b><math>8.172 \times 10^{-29}</math></b> | <b><math>6.287 \times 10^{-28}</math></b> | <b><math>5.836 \times 10^{-28}</math></b> | <b><math>6.478 \times 10^{-28}</math></b> |

| Hyper pol     | CTP4                     | CTP5                     | CTP6                     |
|---------------|--------------------------|--------------------------|--------------------------|
| $\beta_{xxx}$ | $-3.755 \times 10^{-28}$ | $-3.710 \times 10^{-28}$ | $-3.354 \times 10^{-28}$ |
| $\beta_{xxy}$ | $2.520 \times 10^{-28}$  | $2.459 \times 10^{-28}$  | $2.145 \times 10^{-28}$  |
| $\beta_{xyy}$ | $-2.815 \times 10^{-28}$ | $-2.737 \times 10^{-28}$ | $-2.377 \times 10^{-28}$ |
| $\beta_{yyy}$ | $3.866 \times 10^{-28}$  | $3.725 \times 10^{-28}$  | $3.291 \times 10^{-28}$  |
| $\beta_{xxz}$ | $1.723 \times 10^{-31}$  | $4.728 \times 10^{-30}$  | $3.257 \times 10^{-30}$  |
| $\beta_{yyz}$ | $3.657 \times 10^{-29}$  | $4.118 \times 10^{-29}$  | $3.623 \times 10^{-29}$  |
| $\beta_{xzz}$ | $-8.886 \times 10^{-30}$ | $-5.352 \times 10^{-30}$ | $-5.679 \times 10^{-30}$ |
| $\beta_{yzz}$ | $6.869 \times 10^{-30}$  | $4.114 \times 10^{-30}$  | $4.214 \times 10^{-30}$  |
| $\beta_{zzz}$ | $-8.585 \times 10^{-30}$ | $-3.460 \times 10^{-30}$ | $-4.991 \times 10^{-30}$ |

|                 |                         |                         |                         |
|-----------------|-------------------------|-------------------------|-------------------------|
| $\beta_{total}$ | $9.279 \times 10^{-28}$ | $9.012 \times 10^{-28}$ | $7.977 \times 10^{-28}$ |
|-----------------|-------------------------|-------------------------|-------------------------|

**Table S36:** Dynamic first and second order hyperpolarizability ( $\beta$ ), and ( $\gamma$ ) values of studied chromophores in *esu* at diffused basis set.

| Parameters                            | Frequency<br>( $\omega$ ) <sup>a</sup> | CTPR                     | CTP1                     | CTP2                     | CTP3                     |
|---------------------------------------|----------------------------------------|--------------------------|--------------------------|--------------------------|--------------------------|
| $\beta(-\omega; \omega, 0)$           | 0.085645                               | $4.908 \times 10^{-28}$  | $8.098 \times 10^{-27}$  | $1.214 \times 10^{-26}$  | $3.729 \times 10^{-26}$  |
| $\beta(-2\omega; \omega, \omega)$     | 0.085645                               | $6.446 \times 10^{-28}$  | $1.013 \times 10^{-27}$  | $3.580 \times 10^{-27}$  | $5.314 \times 10^{-27}$  |
| $\gamma(-\omega, \omega, 0, 0)$       | 0.085645                               | $4.996 \times 10^{-33}$  | $-2.923 \times 10^{-31}$ | $-6.221 \times 10^{-31}$ | $-1.802 \times 10^{-30}$ |
| $\gamma(-2\omega, \omega, \omega, 0)$ | 0.085645                               | $-2.635 \times 10^{-32}$ | $-2.297 \times 10^{-32}$ | $1.257 \times 10^{-30}$  | $-2.775 \times 10^{-31}$ |

| Parameters                            | Frequency<br>( $\omega$ ) <sup>a</sup> | CTP4                    | CTP5                     | CTP6                     |
|---------------------------------------|----------------------------------------|-------------------------|--------------------------|--------------------------|
| $\beta(-\omega; \omega, 0)$           | 0.085645                               | $5.714 \times 10^{-25}$ | $4.484 \times 10^{-25}$  | $2.300 \times 10^{-26}$  |
| $\beta(-2\omega; \omega, \omega)$     | 0.085645                               | $2.735 \times 10^{-27}$ | $1.718 \times 10^{-25}$  | $1.820 \times 10^{-27}$  |
| $\gamma(-\omega, \omega, 0, 0)$       | 0.085645                               | $5.057 \times 10^{-29}$ | $6.156 \times 10^{-30}$  | $1.626 \times 10^{-30}$  |
| $\gamma(-2\omega, \omega, \omega, 0)$ | 0.085645                               | $4.522 \times 10^{-31}$ | $-6.597 \times 10^{-30}$ | $-3.950 \times 10^{-31}$ |

**Table S37:** Hole-electron analysis indices for  $S_0 \rightarrow S_1$  excitation (with highest  $f_{osc}$ ) of compounds **CTPR** and its derivatives

| Compound     | Excitation            | E (eV) | H <sub>ct</sub> | S <sub>r</sub> (a.u) | H (Å) | HDI  | EDI  |
|--------------|-----------------------|--------|-----------------|----------------------|-------|------|------|
| <b>CTPR</b>  | $S_0 \rightarrow S_1$ | 3.115  | 2.310           | 0.35395              | 3.109 | 8.41 | 7.16 |
| <b>CTP1</b>  | $S_0 \rightarrow S_1$ | 2.259  | 2.486           | 0.1691               | 3.04  | 8.31 | 6.08 |
| <b>CTP2</b>  | $S_0 \rightarrow S_1$ | 2.273  | 2.771           | 0.2186               | 3.613 | 8.04 | 6.21 |
| <b>CTP 3</b> | $S_0 \rightarrow S_1$ | 2.201  | 2.609           | 0.1256               | 3.554 | 8.29 | 5.86 |
| <b>CTP 4</b> | $S_0 \rightarrow S_1$ | 1.997  | 2.334           | 0.1007               | 3.391 | 8.37 | 6.13 |
| <b>CTP 5</b> | $S_0 \rightarrow S_1$ | 1.956  | 2.395           | 0.0978               | 3.449 | 8.51 | 6.07 |
| <b>CTP 6</b> | $S_0 \rightarrow S_1$ | 2.102  | 2.256           | 0.1070               | 3.335 | 8.41 | 6.21 |

Equations S1-S8 are used to calculate global reactivity descriptors.

$$IP = -E_{HOMO} \quad (1)$$

$$EA = -E_{LUMO} \quad (2)$$

$$X = -\frac{(E_{HOMO} + E_{LUMO})}{2} \quad (3)$$

$$\eta = -\frac{E_{LUMO} - E_{HOMO}}{2} \quad (4)$$

$$\mu = \frac{E_{HOMO} + E_{LUMO}}{2} \quad (5)$$

$$\sigma = \frac{1}{2\eta} \quad (6)$$

$$\omega = \frac{\mu^2}{2\eta} \quad (7)$$

$$\Delta N_{max} = -\frac{\mu}{\eta} \quad (8)$$

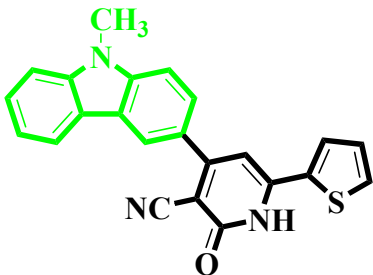

CTPR

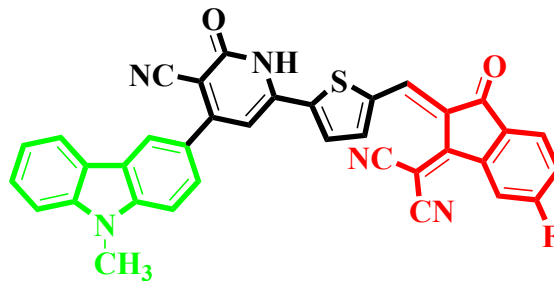

CTP1

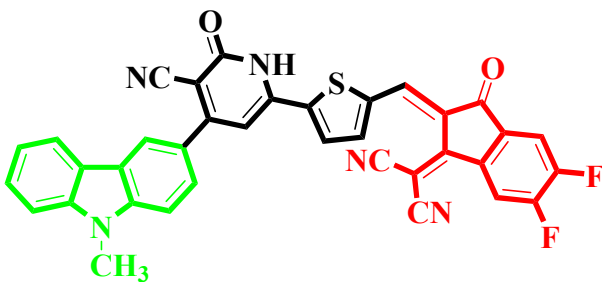

CTP2

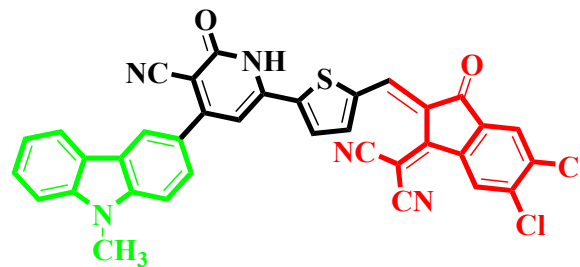

CTP3

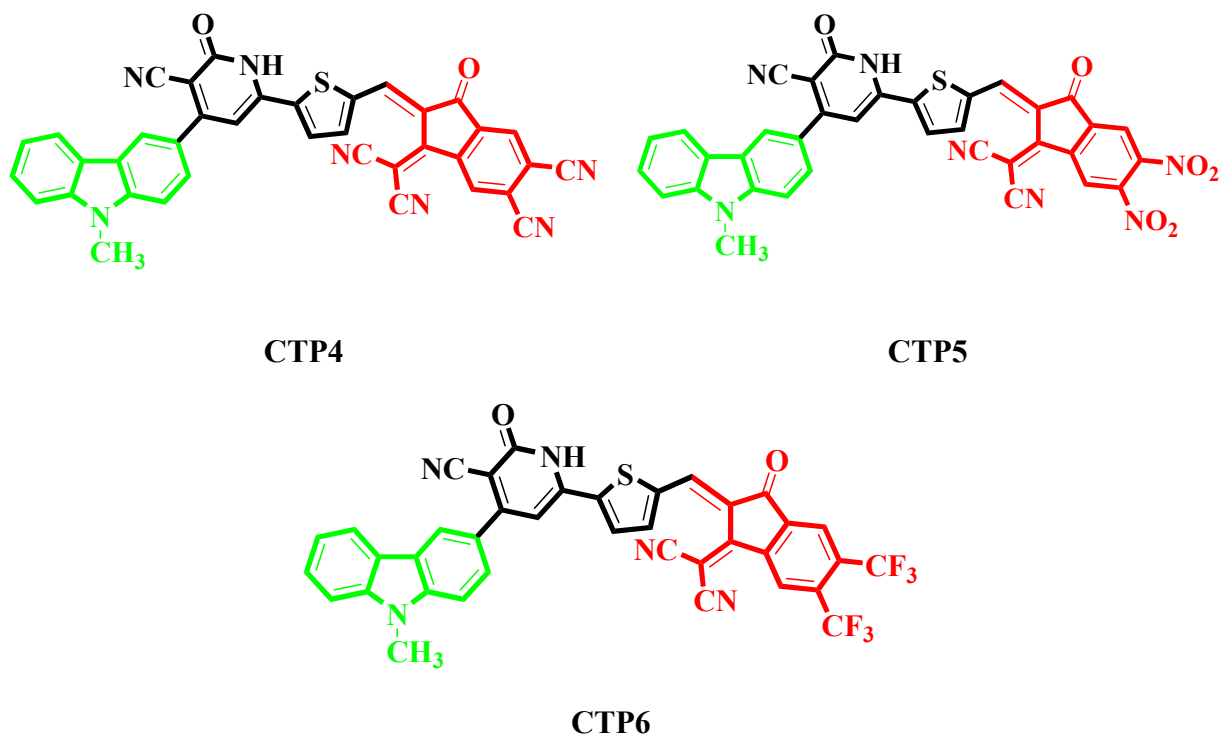

**Figure S1:** Chemical structures of CTPR and (CTP1-CTP6).

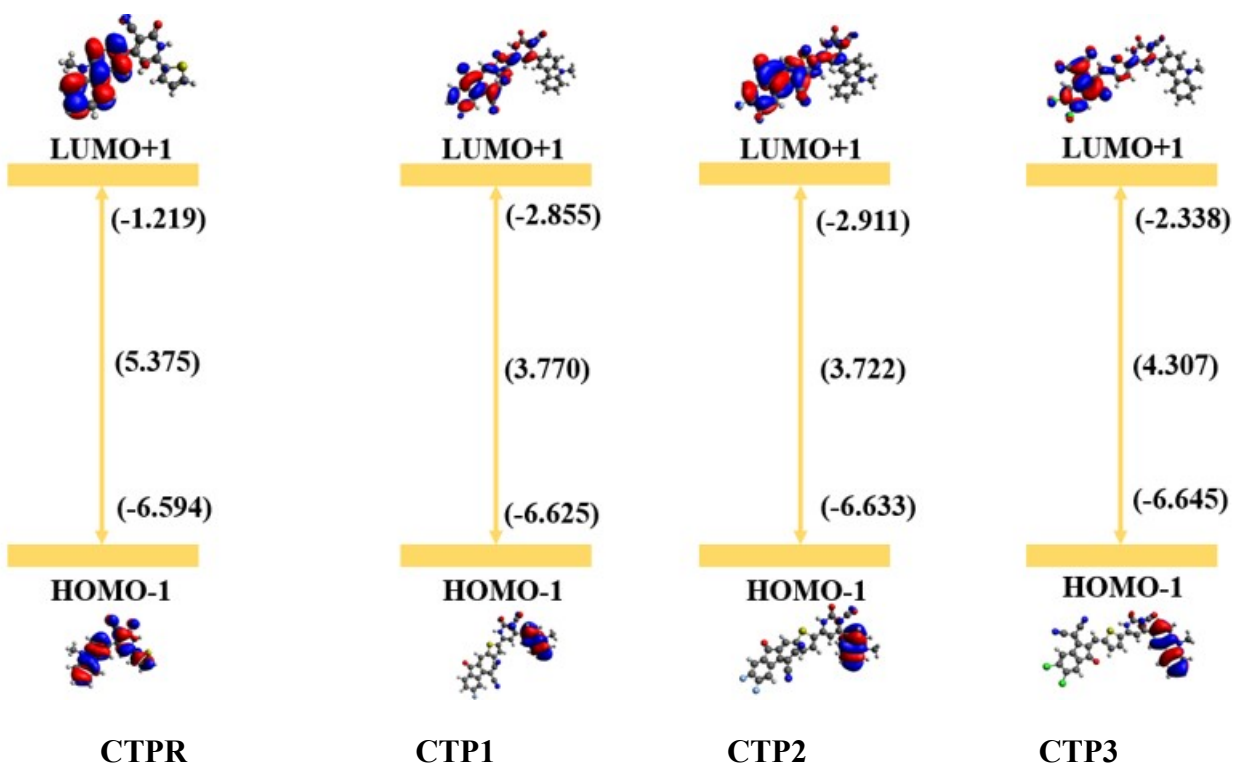

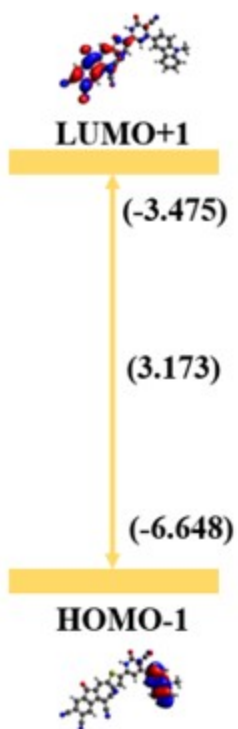

**CTP4**

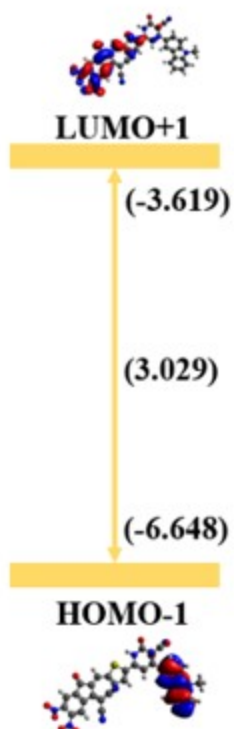

**CTP5**

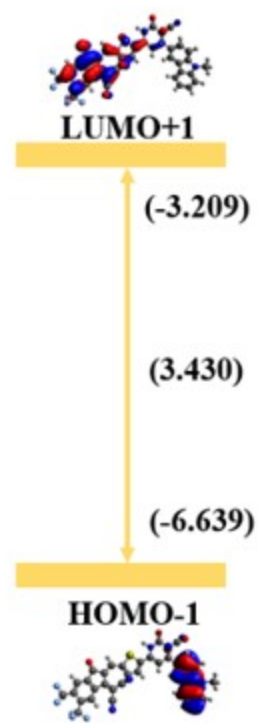

**CTP6**

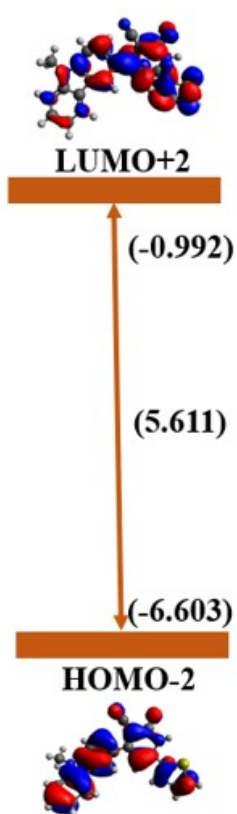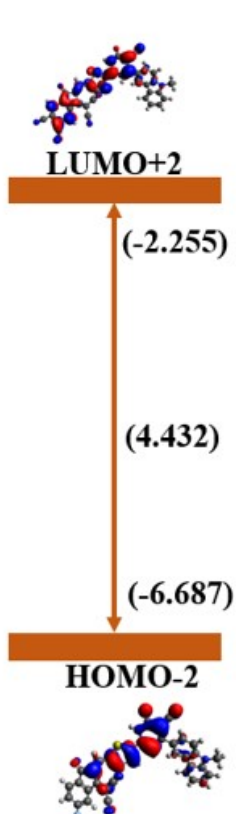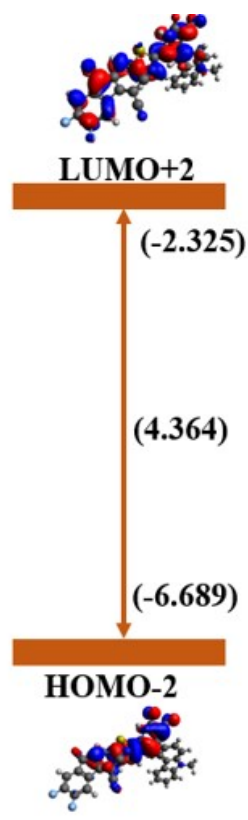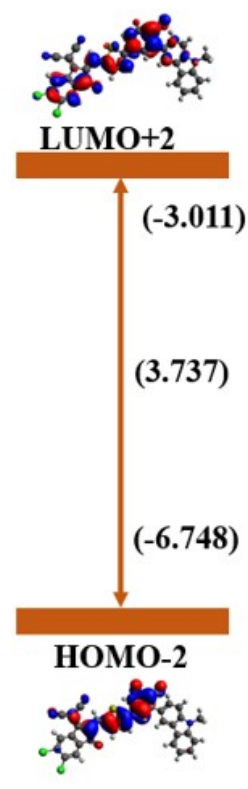

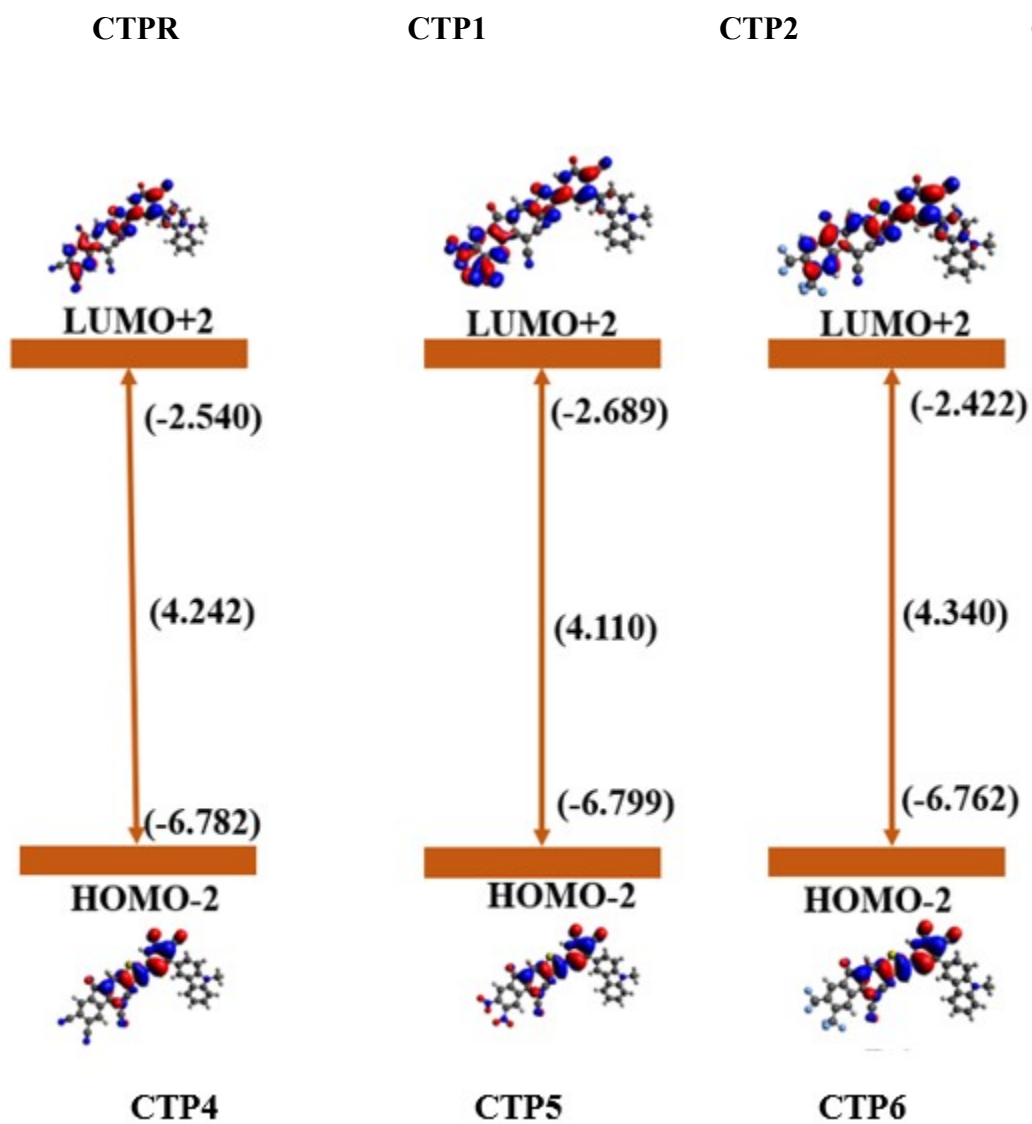

**Figure S2:** FMO pictograms of CTPR and (CTP1-CTP6) for HOMO-1, LUMO+1, HOMO-2, LUMO+2 and their energy gaps in  $eV$ .
